# Supplementary material for: Exploration of the mechanism by which icariin modulates hippocampal neurogenesis in a rat model of depression
Source: PubMed Central journal article supplement — Neural Regen Res. 2021 Aug 4;17(3):632–42. doi: 10.4103/1673-5374.320993 (PMC8504392; doi:10.4103/1673-5374.320993), 2021-08-04
Supplement: NRR-17-632_Suppl1.pdf [file NRR-17-632_Suppl1.pdf]

**Additional Table 2 Gene Ontology annotation of differentially expressed proteins regulated by chronic unpredictable mild stress and icariin**

| Level                     | GO_ID      | Term                                      | Type               | Total | Sequences                                                                                                                                                                                                                                                                                                                                            |
|---------------------------|------------|-------------------------------------------|--------------------|-------|------------------------------------------------------------------------------------------------------------------------------------------------------------------------------------------------------------------------------------------------------------------------------------------------------------------------------------------------------|
| <b>Biological Process</b> |            |                                           |                    |       |                                                                                                                                                                                                                                                                                                                                                      |
| 2                         | GO:0009987 | Cellular process                          | Biological process | 47    | Rps14, Rps19, Rps5, Rps25, Rab1a, Rps3, Tuba1b, Calm3, Nkap, Hdgf, Sars1, Sptbn1, Dkc1, Rpl35, Col2a1, Htra1, Myoc, Chrd, Tgfb1, Rpl17, Rpl27a, Rplp0, Hsp90b1, Hspa9, Hist1h2ail1, Pkn3, Angptl1, Tmed2, Uba1, Taf15, Rpl34, Rps4x, LOC100360647, Rps12, Eif2s1, Eif1ax, Yars, B3gnt2, Cpd, Rab11a, Actb, Rlc-a, Vim, Sumo2, HSP90AA1, Psmc6, Psmd6 |
| 2                         | GO:0008152 | Metabolic process                         | Biological process | 40    | Rab1a, Rps14, Nkap, Hdgf, Sars1, Dkc1, Rps19, Rpl35, Col2a1, Rps3, Rpl17, Rpl27a, Rplp0, Uba1, Taf15, Rpl34, Rps4x, Rps5, LOC100360647, Rps12, Eif2s1, Eif1ax, Yars, Pkn3, B3gnt2, Htra1, Cpd, Sptbn1, Vim, Tmed2, Hspa9, Sumo2, HSP90AA1, Chrd, Hsp90b1, Psmc6, Calm3, Psmd6, Myoc, Hist1h2ail1                                                     |
| 3                         | GO:0071704 | Organic substance metabolic process       | Biological process | 40    | Rps14, Nkap, Hdgf, Sars1, Dkc1, Rps19, Rpl35, Col2a1, Rps3, Rpl17, Rpl27a, Rplp0, Uba1, Taf15, Rpl34, Rps4x, Rps5, LOC100360647, Rps12, Eif2s1, Eif1ax, Yars, Pkn3, B3gnt2, Htra1, Cpd, Sptbn1, Vim, Tmed2, Sumo2, HSP90AA1, Chrd, Hsp90b1, Psmc6, Calm3, Psmd6, Myoc, Hspa9, Hist1h2ail1, Rab1a                                                     |
| 4                         | GO:0043170 | Macromolecule metabolic process           | Biological process | 40    | Rps14, Nkap, Hdgf, Sars1, Dkc1, Rps19, Rpl35, Col2a1, Rps3, Rpl17, Rpl27a, Rplp0, Uba1, Taf15, Rpl34, Rps4x, Rps5, LOC100360647, Rps12, Eif2s1, Eif1ax, Yars, Pkn3, B3gnt2, Htra1, Cpd, Sptbn1, Vim, Tmed2, Sumo2, HSP90AA1, Chrd, Hsp90b1, Psmc6, Calm3, Psmd6, Myoc, Hspa9, Hist1h2ail1, Rab1a                                                     |
| 3                         | GO:0044238 | Primary metabolic process                 | Biological process | 38    | Rps14, Nkap, Hdgf, Sars1, Dkc1, Rps19, Rpl35, Col2a1, Rps3, Rpl17, Rpl27a, Rplp0, Uba1, Taf15, Rpl34, Rps4x, Rps5, LOC100360647, Rps12, Eif2s1, Eif1ax, Yars, Pkn3, B3gnt2, Htra1, Cpd, Sptbn1, Vim, Sumo2, HSP90AA1, Chrd, Hsp90b1, Psmc6, Calm3, Psmd6, Myoc, Hspa9, Rab1a                                                                         |
| 3                         | GO:0006807 | Nitrogen compound metabolic process       | Biological process | 38    | Rps14, Nkap, Hdgf, Sars1, Dkc1, Rps19, Rpl35, Col2a1, Rps3, Rpl17, Rpl27a, Rplp0, Uba1, Taf15, Rpl34, Rps4x, Rps5, LOC100360647, Rps12, Eif2s1, Eif1ax, Yars, Pkn3, B3gnt2, Htra1, Cpd, Sptbn1, Vim, Sumo2, HSP90AA1, Chrd, Hsp90b1, Psmc6, Calm3, Psmd6, Myoc, Hspa9, Rab1a                                                                         |
| 3                         | GO:0044237 | Cellular metabolic process                | Biological process | 38    | Rab1a, Rps14, Nkap, Hdgf, Sars1, Dkc1, Rps19, Rpl35, Col2a1, Rps3, Rpl17, Rpl27a, Rplp0, Uba1, Taf15, Rpl34, Rps4x, Rps5, LOC100360647, Rps12, Eif2s1, Eif1ax, Yars, Pkn3, B3gnt2, Cpd, Sptbn1, Vim, Hspa9, Sumo2, HSP90AA1, Chrd, Hsp90b1, Psmc6, Htra1, Calm3, Psmd6, Myoc                                                                         |
| 4                         | GO:0044260 | Cellular macromolecule metabolic process  | Biological process | 37    | Rps14, Nkap, Hdgf, Sars1, Col2a1, Rps3, Rpl17, Rpl27a, Rplp0, Uba1, Taf15, Rps19, Rpl35, Rpl34, Rps4x, Rps5, LOC100360647, Rps12, Eif2s1, Eif1ax, Yars, Pkn3, B3gnt2, Dkc1, Sptbn1, Vim, Sumo2, HSP90AA1, Chrd, Hsp90b1, Psmc6, Htra1, Calm3, Psmd6, Myoc, Hspa9, Rab1a                                                                              |
| 2                         | GO:0065007 | Biological regulation                     | Biological process | 35    | Rps14, Nkap, Hdgf, Sars1, Htra1, Col2a1, Myoc, Calm3, Chrd, Pkn3, Angptl1, Taf15, Rps5, Dkc1, Sptbn1, Rps19, Rplp0, Hsp90b1, Rps4x, Rlc-a, Vim, Rps3, Tmed2, Rab11a, Sumo2, Cpd, Hspa9, Rab1a, Eif2s1, Actb, HSP90AA1, Psmc6, Psmd6, Hist1h2ail1, Rpl17                                                                                              |
| 4                         | GO:1901564 | Organonitrogen compound metabolic process | Biological process | 33    | Col2a1, Rps3, Rpl17, Rpl27a, Rplp0, Uba1, Rps14, Rps19, Rpl35, Rpl34, Rps4x, Rps5, LOC100360647, Rps12, Eif2s1, Eif1ax, Yars, Sars1, Pkn3, B3gnt2, Htra1, Cpd, Sptbn1, Vim, Sumo2, HSP90AA1, Hsp90b1, Psmc6, Calm3, Psmd6, Myoc, Hspa9, Rab1a                                                                                                        |
| 4                         | GO:0019538 | Protein metabolic process                 | Biological process | 32    | Col2a1, Rps3, Rpl17, Rpl27a, Rplp0, Uba1, Rps14, Rps19, Rpl35, Rpl34, Rps4x, Rps5, LOC100360647, Rps12, Eif2s1, Eif1ax, Yars, Sars1, Pkn3, B3gnt2, Htra1, Cpd, Sptbn1, Vim, Sumo2, HSP90AA1, Hsp90b1, Psmc6, Calm3, Psmd6, Myoc, Hspa9, Rab1a                                                                                                        |
| 2                         | GO:0050896 | Response to stimulus                      | Biological process | 31    | Hsp90b1, Calm3, Rps19, Hspa9, Rab1a, Pkn3, Angptl1, Rps3, Actb, Col2a1, Uba1, Sptbn1, Nkap, B3gnt2, Vim, HSP90AA1, Rps12, Rplp0, Hdgf, Myoc, Chrd, Psmc6, Htra1, Eif2s1, Rab11a, Rpl17, Rps25, Rps4x, Cpd, Tuba1b, Rpl35                                                                                                                             |
| 2                         | GO:0050789 | Regulation of biological process          | Biological process | 30    | Rps14, Nkap, Hdgf, Sars1, Htra1, Myoc, Calm3, Chrd, Pkn3, Angptl1, Taf15, Sptbn1, Rps19, Hsp90b1, Rps4x, Dkc1, Rlc-a, Col2a1, Vim, Rps3, Tmed2, Rab11a, Sumo2, Eif2s1, Rab1a, HSP90AA1, Hspa9, Psmc6, Hist1h2ail1, Rpl17                                                                                                                             |
| 5                         | GO:0044267 | Cellular protein metabolic process        | Biological process | 29    | Rps3, Rpl17, Rpl27a, Rplp0, Uba1, Rps14, Rps19, Rpl35, Rpl34, Rps4x, Rps5, LOC100360647, Rps12, Eif2s1, Eif1ax, Yars, Sars1, Pkn3, B3gnt2, Sptbn1, Vim, Sumo2, HSP90AA1, Hsp90b1, Psmc6, Calm3, Psmd6, Myoc, Hspa9                                                                                                                                   |

|   |            |                                                 |                    |    |                                                                                                                                                                                                                                                                                                                                                      |
|---|------------|-------------------------------------------------|--------------------|----|------------------------------------------------------------------------------------------------------------------------------------------------------------------------------------------------------------------------------------------------------------------------------------------------------------------------------------------------------|
| 5 | GO:0010467 | Gene expression                                 | Biological process | 29 | Rps14, Nkap, Hdgf, Sars1, Dkc1, Rps19, Rpl35, Rps3, Rpl17, Rpl27a, Rplp0, Taf15, Rpl34, Rps4x, Rps5, LOC100360647, Rps12, Eif2s1, Eif1ax, Yars, Cpd, Col2a1, Vim, Tmed2, Sumo2, Chrd, Htra1, Psmc6, Hist1h2ail1                                                                                                                                      |
| 3 | GO:0050794 | Regulation of cellular process                  | Biological process | 29 | Rps14, Nkap, Hdgf, Sars1, Htra1, Myoc, Chrd, Pkn3, Angptl1, Taf15, Sptbn1, Rps19, Calm3, Hsp90b1, Rps4x, Dkc1, Rlc-a, Rab11a, Vim, Rps3, Sumo2, Eif2s1, Rab1a, HSP90AA1, Hspa9, Psmc6, Hist1h2ail1, Rpl17, Col2a1                                                                                                                                    |
| 2 | GO:0071840 | Cellular component organization or biogenesis   | Biological process | 29 | Rplp0, Rpl34, Rps14, Rps19, Rps5, Rps25, Rab1a, Tuba1b, Dkc1, Rpl35, Htra1, Hist1h2ail1, Pkn3, Sptbn1, Tmed2, Rab11a, Actb, B3gnt2, Rlc-a, Vim, Hspa9, Tgfbi, Col2a1, Rps3, Myoc, Hsp90b1, Psmc6, Calm3, Nkap                                                                                                                                        |
| 3 | GO:0051716 | Cellular response to stimulus                   | Biological process | 28 | Rps19, Pkn3, Angptl1, Rps3, Uba1, Sptbn1, Nkap, Calm3, Hdgf, Myoc, Chrd, Col2a1, Hsp90b1, Psmc6, Htra1, Eif2s1, Rab1a, Rab11a, Rpl17, Rps25, Hspa9, Vim, Actb, Rplp0, Cpd, Tuba1b, Rpl35, B3gnt2                                                                                                                                                     |
| 3 | GO:0009058 | Biosynthetic process                            | Biological process | 27 | Rps14, Nkap, Hdgf, Sars1, Rps3, Rpl17, Rpl27a, Rplp0, Taf15, Rps19, Rpl35, Rpl34, Rps4x, Rps5, LOC100360647, Rps12, Eif2s1, Eif1ax, Yars, B3gnt2, Dkc1, Vim, Sumo2, Chrd, Htra1, HSP90AA1, Psmc6                                                                                                                                                     |
| 4 | GO:0044249 | Cellular biosynthetic process                   | Biological process | 27 | Rps14, Nkap, Hdgf, Sars1, Rps3, Rpl17, Rpl27a, Rplp0, Taf15, Rps19, Rpl35, Rpl34, Rps4x, Rps5, LOC100360647, Rps12, Eif2s1, Eif1ax, Yars, B3gnt2, Dkc1, Vim, Sumo2, Chrd, Htra1, HSP90AA1, Psmc6                                                                                                                                                     |
| 4 | GO:0034641 | Cellular nitrogen compound metabolic process    | Biological process | 27 | Rps14, Nkap, Hdgf, Sars1, Dkc1, Rps19, Rpl35, Rps3, Rpl17, Rpl27a, Rplp0, Taf15, Rpl34, Rps4x, Rps5, LOC100360647, Rps12, Eif2s1, Eif1ax, Yars, Cpd, Vim, Sumo2, Chrd, Htra1, HSP90AA1, Psmc6                                                                                                                                                        |
| 5 | GO:0044271 | Cellular nitrogen compound biosynthetic process | Biological process | 26 | Rps14, Nkap, Hdgf, Sars1, Rps3, Rpl17, Rpl27a, Rplp0, Taf15, Rps19, Rpl35, Rpl34, Rps4x, Rps5, LOC100360647, Rps12, Eif2s1, Eif1ax, Yars, Dkc1, Vim, Sumo2, Chrd, Htra1, HSP90AA1, Psmc6                                                                                                                                                             |
| 4 | GO:1901576 | Organic substance biosynthetic process          | Biological process | 26 | Rps14, Nkap, Hdgf, Sars1, Rps3, Rpl17, Rpl27a, Rplp0, Taf15, Rps19, Rpl35, Rpl34, Rps4x, Rps5, LOC100360647, Rps12, Eif2s1, Eif1ax, Yars, B3gnt2, Dkc1, Vim, Sumo2, Chrd, Htra1, Psmc6                                                                                                                                                               |
| 5 | GO:0034645 | Cellular macromolecule biosynthetic process     | Biological process | 26 | Rps14, Nkap, Hdgf, Sars1, Rps3, Rpl17, Rpl27a, Rplp0, Taf15, Rps19, Rpl35, Rpl34, Rps4x, Rps5, LOC100360647, Rps12, Eif2s1, Eif1ax, Yars, B3gnt2, Dkc1, Vim, Sumo2, Chrd, Htra1, Psmc6                                                                                                                                                               |
| 5 | GO:0009059 | Macromolecule biosynthetic process              | Biological process | 26 | Rps14, Nkap, Hdgf, Sars1, Rps3, Rpl17, Rpl27a, Rplp0, Taf15, Rps19, Rpl35, Rpl34, Rps4x, Rps5, LOC100360647, Rps12, Eif2s1, Eif1ax, Yars, B3gnt2, Dkc1, Vim, Sumo2, Chrd, Htra1, Psmc6                                                                                                                                                               |
| 3 | GO:0016043 | Cellular component organization                 | Biological process | 26 | Rps14, Rps19, Rps5, Rps25, Rab1a, Tuba1b, Htra1, Hist1h2ail1, Pkn3, Sptbn1, Dkc1, Tmed2, Rab11a, Actb, B3gnt2, Rlc-a, Vim, Hspa9, Tgfbi, Col2a1, Rps3, Myoc, Hsp90b1, Psmc6, Calm3, Nkap                                                                                                                                                             |
| 1 | GO:0008150 | Biological_process                              | Biological process | 26 | Rplp0, Rpl34, Rps14, Rps19, Rps5, Rps25, Rab1a, Rps3, Tuba1b, Calm3, Nkap, Hdgf, Sars1, Sptbn1, Dkc1, Rpl35, Col2a1, Chrd, Tgfbi, Htra1, Myoc, Hsp90b1, Tmed2, Rpl17, Rpl27a, Hspa9, Hist1h2ail1, Pkn3, Rab11a, Angptl1, Uba1, Taf15, Rps4x, LOC100360647, Rps12, Eif2s1, Eif1ax, Yars, B3gnt2, Cpd, Actb, Vim, Rlc-a, HSP90AA1, Sumo2, Psmc6, Psmc6 |
| 3 | GO:0019222 | Regulation of metabolic process                 | Biological process | 23 | Rps14, Nkap, Hdgf, Sars1, Taf15, Col2a1, Vim, Rps3, Tmed2, Rps4x, Sumo2, Chrd, Htra1, Eif2s1, Dkc1, Calm3, Myoc, Hsp90b1, HSP90AA1, Psmc6, Rps19, Hist1h2ail1, Rab1a                                                                                                                                                                                 |
| 2 | GO:0032501 | Multicellular organismal process                | Biological process | 22 | Col2a1, Chrd, Tgfbi, Myoc, Tmed2, Htra1, Calm3, Rps4x, Actb, B3gnt2, Rplp0, Pkn3, Rab11a, Vim, Sars1, Nkap, Rps14, Rps19, Hspa9, Rps3, Rab1a, Sptbn1                                                                                                                                                                                                 |
| 4 | GO:0060255 | Regulation of macromolecule metabolic process   | Biological process | 21 | Rps14, Nkap, Hdgf, Sars1, Taf15, Col2a1, Vim, Rps3, Tmed2, Rps4x, Sumo2, Chrd, Htra1, Eif2s1, Dkc1, Calm3, Myoc, Hsp90b1, Psmc6, Hist1h2ail1, Rab1a                                                                                                                                                                                                  |
| 2 | GO:0051179 | Localization                                    | Biological process | 20 | Rps19, Rab11a, Tmed2, Hspa9, Rab1a, Rplp0, Pkn3, Calm3, Myoc, Chrd, Hsp90b1, Hdgf, Sumo2, Sptbn1, Actb, HSP90AA1, Rlc-a, Vim, Nkap, Dkc1                                                                                                                                                                                                             |
| 2 | GO:0048518 | Positive regulation of biological process       | Biological process | 20 | Chrd, Rps4x, Dkc1, Vim, Rps3, Tmed2, Rab11a, Myoc, Sumo2, Calm3, HSP90AA1, Psmc6, Hdgf, Nkap, Htra1, Rps19, Sptbn1, Rpl17, Eif2s1, Rab1a                                                                                                                                                                                                             |
| 2 | GO:0048519 | Negative regulation of biological process       | Biological process | 20 | Rps14, Nkap, Hdgf, Sars1, Myoc, Hsp90b1, Calm3, Vim, Tmed2, Sumo2, Rps3, Chrd, Htra1, Eif2s1, Hspa9, Sptbn1, Rps19, Hist1h2ail1, Dkc1, Col2a1                                                                                                                                                                                                        |
| 2 | GO:0032502 | Developmental process                           | Biological process | 20 | Col2a1, Chrd, Tgfbi, Myoc, Tmed2, Htra1, Rps4x, Actb, B3gnt2, Vim, Eif2s1, Rplp0, Rlc-a, Sars1, Nkap, Rps14, Rps19, Hspa9, Rab11a, Rab1a                                                                                                                                                                                                             |
| 3 | GO:0042221 | Response to chemical                            | Biological process | 20 | Calm3, Rps19, Hspa9, B3gnt2, Vim, Rps12, Rplp0, HSP90AA1, Chrd, Hsp90b1, Psmc6, Htra1, Rps4x, Rps3, Col2a1, Cpd, Tuba1b, Actb, Myoc, Eif2s1                                                                                                                                                                                                          |

|   |            |                                                   |                    |    |                                                                                                                                           |
|---|------------|---------------------------------------------------|--------------------|----|-------------------------------------------------------------------------------------------------------------------------------------------|
| 4 | GO:0006996 | Organelle organization                            | Biological process | 19 | Rps14, Rps19, Rps5, Rps25, Rab1a, Tuba1b, Hist1h2ail1, Pkn3, Sptbn1, Dkc1, Tmed2, Rab11a, Rps3, Hsp90b1, Vim, Myoc, Calm3, Actb, Nkap     |
| 5 | GO:0043603 | Cellular amide metabolic process                  | Biological process | 19 | Rps3, Rpl17, Rpl27a, Rplp0, Rps14, Rps19, Rpl35, Rpl34, Rps4x, Rps5, LOC100360647, Rps12, Eif2s1, Eif1ax, Yars, Sars1, Cpd, Vim, HSP90AA1 |
| 5 | GO:0006518 | Peptide metabolic process                         | Biological process | 19 | Rps3, Rpl17, Rpl27a, Rplp0, Rps14, Rps19, Rpl35, Rpl34, Rps4x, Rps5, LOC100360647, Rps12, Eif2s1, Eif1ax, Yars, Sars1, Vim, Cpd, HSP90AA1 |
| 4 | GO:0051171 | Regulation of nitrogen compound metabolic process | Biological process | 19 | Rps14, Nkap, Hdgf, Sars1, Taf15, Vim, Rps4x, Sumo2, Rps3, Chrd, Htra1, Eif2s1, Dkc1, Calm3, Myoc, Hsp90b1, HSP90AA1, Psmc6, Rab1a         |
| 4 | GO:0031323 | Regulation of cellular metabolic process          | Biological process | 19 | Rps14, Nkap, Hdgf, Sars1, Taf15, Vim, Rps4x, Sumo2, Rps3, Chrd, Htra1, Eif2s1, Dkc1, Calm3, Myoc, Hsp90b1, HSP90AA1, Psmc6, Rab1a         |
| 3 | GO:0007154 | Cell communication                                | Biological process | 19 | Pkn3, Angptl1, Sptbn1, Nkap, Rps19, Calm3, Hdgf, Myoc, Chrd, Rps3, Rab1a, Htra1, Rab11a, Rpl17, Rps25, Eif2s1, Vim, Col2a1, Hsp90b1       |
| 3 | GO:0048856 | Anatomical structure development                  | Biological process | 19 | Col2a1, Chrd, Tgfb1, Tmed2, Htra1, Rps4x, Actb, B3gnt2, Rplp0, Rlc-a, Vim, Sars1, Myoc, Nkap, Rps14, Rps19, Hspa9, Rab11a, Rab1a          |
| 3 | GO:0044085 | Cellular component biogenesis                     | Biological process | 18 | Rplp0, Rpl34, Rps14, Rps19, Rps5, Rps25, Rab1a, Dkc1, Rpl35, Hist1h2ail1, Pkn3, Hspa9, Rps3, Hsp90b1, Rab11a, Psmc6, Myoc, Sptbn1         |
| 5 | GO:1901566 | Organonitrogen compound biosynthetic process      | Biological process | 18 | Rps3, Rpl17, Rpl27a, Rplp0, Rps14, Rps19, Rpl35, Rpl34, Rps4x, Rps5, LOC100360647, Rps12, Eif2s1, Eif1ax, Yars, Sars1, B3gnt2, Vim        |
| 3 | GO:0048522 | Positive regulation of cellular process           | Biological process | 18 | Chrd, Rps4x, Dkc1, Rab11a, Myoc, Vim, Rps3, Sumo2, Calm3, HSP90AA1, Psmc6, Hdgf, Nkap, Htra1, Sptbn1, Rpl17, Eif2s1, Rab1a                |
| 4 | GO:0080090 | Regulation of primary metabolic process           | Biological process | 18 | Rps14, Nkap, Hdgf, Sars1, Taf15, Vim, Rps4x, Sumo2, Rps3, Chrd, Htra1, Eif2s1, Dkc1, Calm3, Myoc, Hsp90b1, Psmc6, Rab1a                   |
| 6 | GO:0043604 | Amide biosynthetic process                        | Biological process | 17 | Rps3, Rpl17, Rpl27a, Rplp0, Rps14, Rps19, Rpl35, Rpl34, Rps4x, Rps5, LOC100360647, Rps12, Eif2s1, Eif1ax, Yars, Sars1, Vim                |
| 6 | GO:0043043 | Peptide biosynthetic process                      | Biological process | 17 | Rps3, Rpl17, Rpl27a, Rplp0, Rps14, Rps19, Rpl35, Rpl34, Rps4x, Rps5, LOC100360647, Rps12, Eif2s1, Eif1ax, Yars, Sars1, Vim                |
| 6 | GO:0006412 | Translation                                       | Biological process | 17 | Rps3, Rpl17, Rpl27a, Rplp0, Eif1ax, Eif2s1, Rps14, Yars, Sars1, Vim, Rps4x, Rps19, Rpl35, Rpl34, Rps5, LOC100360647, Rps12                |
| 5 | GO:0010468 | Regulation of gene expression                     | Biological process | 17 | Rps14, Nkap, Hdgf, Sars1, Taf15, Vim, Rps3, Tmed2, Rps4x, Sumo2, Chrd, Htra1, Eif2s1, Psmc6, Hist1h2ail1, Dkc1, Col2a1                    |
| 3 | GO:0048523 | Negative regulation of cellular process           | Biological process | 17 | Rps14, Nkap, Hdgf, Sars1, Myoc, Hsp90b1, Calm3, Vim, Sumo2, Rps3, Chrd, Htra1, Eif2s1, Hspa9, Sptbn1, Dkc1, Col2a1                        |
| 3 | GO:0007275 | Multicellular organism development                | Biological process | 17 | Col2a1, Chrd, Tgfb1, Tmed2, Htra1, Actb, B3gnt2, Rplp0, Vim, Sars1, Myoc, Nkap, Rps14, Rps19, Hspa9, Rab11a, Rps4x                        |
| 4 | GO:0010033 | Response to organic substance                     | Biological process | 17 | Calm3, Hspa9, Rps12, Chrd, Hsp90b1, Psmc6, Htra1, Vim, Rps4x, Col2a1, Rplp0, Cpd, Tuba1b, Rps3, Actb, Myoc, B3gnt2                        |
| 3 | GO:0065008 | Regulation of biological quality                  | Biological process | 16 | Col2a1, Calm3, Rps5, Dkc1, Rplp0, Rlc-a, Rab11a, Cpd, Rps14, Rps19, Hspa9, Rab1a, Vim, HSP90AA1, Sptbn1, Myoc                             |
| 4 | GO:0048731 | System development                                | Biological process | 16 | Col2a1, Chrd, Tgfb1, Tmed2, Htra1, Actb, B3gnt2, Rplp0, Vim, Sars1, Myoc, Nkap, Rps14, Rps19, Hspa9, Rab11a                               |
| 4 | GO:1901360 | Organic cyclic compound metabolic process         | Biological process | 15 | Rps14, Nkap, Hdgf, Sars1, Dkc1, Rps19, Rpl35, Rps3, Taf15, Yars, Sumo2, Chrd, Htra1, Vim, Psmc6                                           |
| 4 | GO:0046483 | Heterocycle metabolic process                     | Biological process | 15 | Rps14, Nkap, Hdgf, Sars1, Dkc1, Rps19, Rpl35, Rps3, Taf15, Yars, Sumo2, Chrd, Htra1, Vim, Psmc6                                           |
| 4 | GO:0006725 | Cellular aromatic compound metabolic process      | Biological process | 15 | Rps14, Nkap, Hdgf, Sars1, Dkc1, Rps19, Rpl35, Rps3, Taf15, Yars, Sumo2, Chrd, Htra1, Vim, Psmc6                                           |
| 4 | GO:0006139 | Nucleobase-containing compound metabolic process  | Biological process | 15 | Rps14, Nkap, Hdgf, Sars1, Dkc1, Rps19, Rpl35, Rps3, Taf15, Yars, Sumo2, Chrd, Htra1, Vim, Psmc6                                           |
| 4 | GO:0009889 | Regulation of biosynthetic process                | Biological process | 15 | Rps14, Nkap, Hdgf, Sars1, Taf15, Vim, Rps4x, Sumo2, Rps3, Chrd, Htra1, Eif2s1, Dkc1, HSP90AA1, Psmc6                                      |
| 5 | GO:0031326 | Regulation of cellular biosynthetic process       | Biological process | 15 | Rps14, Nkap, Hdgf, Sars1, Taf15, Vim, Rps4x, Sumo2, Rps3, Chrd, Htra1, Eif2s1, Dkc1, HSP90AA1, Psmc6                                      |
| 5 | GO:0090304 | Nucleic acid metabolic process                    | Biological process | 15 | Rps14, Nkap, Hdgf, Sars1, Dkc1, Rps19, Rpl35, Rps3, Taf15, Yars, Sumo2, Chrd, Htra1, Vim, Psmc6                                           |
| 6 | GO:0016070 | RNA metabolic process                             | Biological process | 15 | Rps14, Nkap, Hdgf, Sars1, Dkc1, Rps19, Rpl35, Rps3, Taf15, Yars, Sumo2, Chrd, Htra1, Vim, Psmc6                                           |
| 2 | GO:0023052 | Signaling                                         | Biological process | 15 | Pkn3, Angptl1, Sptbn1, Nkap, Rps19, Calm3, Hdgf, Myoc, Chrd, Rps3, Rab1a, Htra1, Rab11a, Vim, Col2a1                                      |

|   |            |                                                                |                    |    |                                                                                                        |
|---|------------|----------------------------------------------------------------|--------------------|----|--------------------------------------------------------------------------------------------------------|
| 3 | GO:0007165 | Signal transduction                                            | Biological process | 15 | Angptl1, Sptbn1, Nkap, Rps19, Calm3, Hdgf, Myoc, Chrd, Rps3, Htra1, Rab1a, Rab11a, Vim, Col2a1, Pkn3   |
| 3 | GO:0048869 | Cellular developmental process                                 | Biological process | 15 | Myoc, Chrd, Tgfb1, Col2a1, Actb, B3gnt2, Rlc-a, Vim, Rps14, Rps19, Hspa9, Nkap, Rab11a, Rab1a, Htra1   |
| 4 | GO:0070887 | Cellular response to chemical stimulus                         | Biological process | 15 | Rps19, Chrd, Htra1, Hspa9, Vim, Rps3, Hsp90b1, Col2a1, Rplp0, Cpd, Tuba1b, Actb, Myoc, Eif2s1, B3gnt2  |
| 4 | GO:0022607 | Cellular component assembly                                    | Biological process | 14 | Rps14, Rps19, Rps5, Rps25, Rab1a, Hist1h2ail1, Pkn3, Hspa9, Rps3, Hsp90b1, Rab11a, Psmc6, Myoc, Sptbn1 |
| 3 | GO:0006950 | Response to stress                                             | Biological process | 14 | Hsp90b1, Hspa9, Rab1a, Rps3, Uba1, Rps19, HSP90AA1, Psmc6, Eif2s1, Rpl17, Rps25, Actb, Vim, Htra1      |
| 5 | GO:0010556 | Regulation of macromolecule biosynthetic process               | Biological process | 14 | Rps14, Nkap, Hdgf, Sars1, Taf15, Vim, Rps4x, Sumo2, Rps3, Chrd, Htra1, Eif2s1, Dkc1, Psmc6             |
| 6 | GO:2000112 | Regulation of cellular macromolecule biosynthetic process      | Biological process | 14 | Rps14, Nkap, Hdgf, Sars1, Taf15, Vim, Rps4x, Sumo2, Rps3, Chrd, Htra1, Eif2s1, Dkc1, Psmc6             |
| 4 | GO:0030154 | Cell differentiation                                           | Biological process | 14 | Myoc, Chrd, Tgfb1, Col2a1, Actb, B3gnt2, Vim, Rps14, Rps19, Hspa9, Nkap, Rab11a, Rab1a, Htra1          |
| 3 | GO:0033036 | Macromolecule localization                                     | Biological process | 13 | Hspa9, Rab1a, Rab11a, Tmed2, Hsp90b1, Hdgf, Sumo2, Sptbn1, HSP90AA1, Rlc-a, Calm3, Nkap, Dkc1          |
| 4 | GO:0008104 | Protein localization                                           | Biological process | 13 | Hspa9, Rab1a, Rab11a, Tmed2, Hsp90b1, Hdgf, Sumo2, Sptbn1, HSP90AA1, Rlc-a, Calm3, Nkap, Dkc1          |
| 5 | GO:0043412 | Macromolecule modification                                     | Biological process | 13 | Dkc1, Uba1, Pkn3, B3gnt2, Sptbn1, Sumo2, HSP90AA1, Rps3, Calm3, Myoc, Hsp90b1, Hspa9, Eif2s1           |
| 4 | GO:0048513 | Animal organ development                                       | Biological process | 13 | Col2a1, Htra1, Tmed2, Tgfb1, Rplp0, Chrd, Nkap, Rps14, Rps19, Hspa9, Vim, Actb, Myoc                   |
| 5 | GO:0071310 | Cellular response to organic substance                         | Biological process | 13 | Chrd, Htra1, Hspa9, Vim, Col2a1, Hsp90b1, Rplp0, Cpd, Tuba1b, Rps3, Actb, Myoc, B3gnt2                 |
| 3 | GO:0009653 | Anatomical structure morphogenesis                             | Biological process | 13 | Col2a1, Tgfb1, Chrd, Tmed2, Actb, B3gnt2, Rlc-a, Sars1, Rab1a, Rab11a, Vim, Htra1, Myoc                |
| 3 | GO:0051641 | Cellular localization                                          | Biological process | 12 | Tmed2, Hspa9, Rab1a, Rab11a, Calm3, Hsp90b1, Hdgf, Sumo2, Sptbn1, Rlc-a, Nkap, Dkc1                    |
| 3 | GO:0009893 | Positive regulation of metabolic process                       | Biological process | 12 | Vim, Rps3, Tmed2, Rps4x, Dkc1, Sumo2, Calm3, HSP90AA1, Psmc6, Hdgf, Rps19, Rab1a                       |
| 4 | GO:0070727 | Cellular macromolecule localization                            | Biological process | 12 | Hspa9, Rab1a, Rab11a, Tmed2, Hsp90b1, Hdgf, Sumo2, Sptbn1, Rlc-a, Calm3, Nkap, Dkc1                    |
| 5 | GO:0034613 | Cellular protein localization                                  | Biological process | 12 | Hspa9, Rab1a, Rab11a, Tmed2, Hsp90b1, Hdgf, Sptbn1, Rlc-a, Calm3, Nkap, Dkc1, Sumo2                    |
| 5 | GO:0019219 | Regulation of nucleobase-containing compound metabolic process | Biological process | 12 | Rps14, Nkap, Hdgf, Sars1, Taf15, Sumo2, Chrd, Htra1, Rps3, Dkc1, Vim, Psmc6                            |
| 5 | GO:0036211 | Protein modification process                                   | Biological process | 12 | Uba1, Pkn3, B3gnt2, Sptbn1, Sumo2, HSP90AA1, Rps3, Calm3, Myoc, Hsp90b1, Hspa9, Eif2s1                 |
| 6 | GO:0006464 | Cellular protein modification process                          | Biological process | 12 | Uba1, Pkn3, B3gnt2, Sptbn1, Sumo2, HSP90AA1, Rps3, Calm3, Myoc, Hsp90b1, Hspa9, Eif2s1                 |
| 5 | GO:0051252 | Regulation of rna metabolic process                            | Biological process | 12 | Rps14, Nkap, Hdgf, Sars1, Taf15, Sumo2, Chrd, Htra1, Vim, Psmc6, Rps3, Dkc1                            |
| 3 | GO:0009605 | Response to external stimulus                                  | Biological process | 12 | Rps19, Rab1a, Actb, Col2a1, B3gnt2, Vim, Rpl17, Rps25, Eif2s1, Htra1, Hspa9, Hsp90b1                   |
| 3 | GO:0051234 | Establishment of localization                                  | Biological process | 11 | Rab11a, Tmed2, Hspa9, Rab1a, Rplp0, Calm3, Hsp90b1, Sptbn1, HSP90AA1, Nkap, Dkc1                       |
| 3 | GO:0009892 | Negative regulation of metabolic process                       | Biological process | 11 | Rps14, Nkap, Hdgf, Sars1, Sumo2, Rps3, Eif2s1, Vim, Rps19, Hist1h2ail1, Dkc1                           |
| 4 | GO:0043933 | Protein-containing complex subunit organization                | Biological process | 11 | Rps14, Rps19, Rps5, Rps25, Hist1h2ail1, Pkn3, Col2a1, Rps3, Psmc6, Sptbn1,                             |
| 5 | GO:0051246 | Regulation of protein metabolic process                        | Biological process | 11 | Rps14, Vim, Rps4x, Rps3, Eif2s1, Sumo2, Calm3, Myoc, Hsp90b1, Psmc6, Rab1a                             |
| 4 | GO:0051128 | Regulation of cellular component organization                  | Biological process | 11 | Htra1, Rlc-a, Vim, Rps3, Dkc1, Rab11a, Psmc6, Myoc, Sptbn1, Calm3, Nkap                                |
| 5 | GO:1901362 | Organic cyclic compound biosynthetic process                   | Biological process | 11 | Rps14, Nkap, Hdgf, Sars1, Rps3, Taf15, Dkc1, Sumo2, Chrd, Htra1, Psmc6                                 |
| 5 | GO:0018130 | Heterocycle biosynthetic process                               | Biological process | 11 | Rps14, Nkap, Hdgf, Sars1, Rps3, Taf15, Dkc1, Sumo2, Chrd, Htra1, Psmc6                                 |
| 5 | GO:0019438 | Aromatic compound biosynthetic process                         | Biological process | 11 | Rps14, Nkap, Hdgf, Sars1, Rps3, Taf15, Dkc1, Sumo2, Chrd, Htra1, Psmc6                                 |
| 5 | GO:0034654 | Nucleobase-containing compound biosynthetic process            | Biological process | 11 | Rps14, Nkap, Hdgf, Sars1, Rps3, Taf15, Dkc1, Sumo2, Chrd, Htra1, Psmc6                                 |
| 4 | GO:0006810 | Transport                                                      | Biological process | 10 | Rab11a, Tmed2, Hspa9, Rab1a, Rplp0, Calm3, Hsp90b1, Sptbn1, HSP90AA1,                                  |
| 4 | GO:0045184 | Establishment of protein localization                          | Biological process | 10 | Hspa9, Rab1a, Rab11a, Tmed2, Hsp90b1, Sptbn1, HSP90AA1, Calm3, Nkap, Dkc1                              |
| 4 | GO:0051173 | Positive regulation of nitrogen compound metabolic process     | Biological process | 10 | Vim, Rps4x, Rps3, Dkc1, Sumo2, Calm3, HSP90AA1, Psmc6, Hdgf, Rab1a                                     |

|   |            |                                                            |                    |    |                                                                          |
|---|------------|------------------------------------------------------------|--------------------|----|--------------------------------------------------------------------------|
| 4 | GO:0010604 | Positive regulation of macromolecule metabolic process     | Biological process | 10 | Vim, Rps3, Tmed2, Rps4x, Dkc1, Sumo2, Calm3, Psmc6, Hdgf, Rab1a          |
| 5 | GO:0065003 | Protein-containing complex assembly                        | Biological process | 10 | Rps14, Rps19, Rps5, Rps25, Hist1h2ail1, Pkn3, Rps3, Psmc6, Sptbn1, Rab1a |
| 4 | GO:0031325 | Positive regulation of cellular metabolic process          | Biological process | 10 | Vim, Rps4x, Rps3, Dkc1, Sumo2, Calm3, HSP90AA1, Psmc6, Hdgf, Rab1a       |
| 6 | GO:0034622 | Cellular protein-containing complex assembly               | Biological process | 10 | Rps14, Rps19, Rps5, Rps25, Hist1h2ail1, Pkn3, Rps3, Psmc6, Sptbn1, Rab1a |
| 4 | GO:0010605 | Negative regulation of macromolecule metabolic process     | Biological process | 10 | Rps14, Nkap, Hdgf, Sars1, Sumo2, Rps3, Eif2s1, Vim, Hist1h2ail1, Dkc1    |
| 5 | GO:0032268 | Regulation of cellular protein metabolic process           | Biological process | 10 | Rps14, Vim, Rps4x, Rps3, Eif2s1, Sumo2, Calm3, Myoc, Hsp90b1, Psmc6      |
| 3 | GO:0051239 | Regulation of multicellular organismal process             | Biological process | 10 | Calm3, Rab11a, Vim, Sars1, Chrd, Rps3, Hspa9, Nkap, Rps19, Sptbn1        |
| 6 | GO:2001141 | Regulation of RNA biosynthetic process                     | Biological process | 10 | Rps14, Nkap, Hdgf, Sars1, Taf15, Sumo2, Chrd, Htra1, Psmc6, Rps3         |
| 6 | GO:0006351 | Transcription, DNA-templated                               | Biological process | 10 | Rps14, Nkap, Hdgf, Sars1, Taf15, Sumo2, Chrd, Htra1, Psmc6, Rps3         |
| 6 | GO:0032774 | RNA biosynthetic process                                   | Biological process | 10 | Rps14, Nkap, Hdgf, Sars1, Rps3, Taf15, Sumo2, Chrd, Htra1, Psmc6         |
| 6 | GO:0006355 | Regulation of transcription, DNA-templated                 | Biological process | 10 | Rps14, Nkap, Hdgf, Sars1, Sumo2, Chrd, Htra1, Psmc6, Rps3, Taf15         |
| 7 | GO:1903506 | Regulation of nucleic acid-templated transcription         | Biological process | 10 | Rps14, Nkap, Hdgf, Sars1, Taf15, Sumo2, Chrd, Htra1, Psmc6, Rps3         |
| 7 | GO:0097659 | Nucleic acid-templated transcription                       | Biological process | 10 | Rps14, Nkap, Hdgf, Sars1, Rps3, Taf15, Sumo2, Chrd, Htra1, Psmc6         |
| 3 | GO:0009719 | Response to endogenous stimulus                            | Biological process | 10 | Chrd, Htra1, Vim, Hsp90b1, Rplp0, Col2a1, Actb, Hspa9, Rps3, Myoc        |
| 4 | GO:0007166 | Cell surface receptor signaling pathway                    | Biological process | 10 | Angptl1, Sptbn1, Nkap, Rps19, Chrd, Rps3, Htra1, Myoc, Vim, Col2a1       |
| 3 | GO:0009056 | Catabolic process                                          | Biological process | 9  | Rab1a, Uba1, Hsp90b1, Psmc6, Sumo2, Psm6, Vim, HSP90AA1, Dkc1            |
| 4 | GO:0044248 | Cellular catabolic process                                 | Biological process | 9  | Rab1a, Uba1, Hsp90b1, Psmc6, Sumo2, Psm6, Vim, HSP90AA1, Dkc1            |
| 3 | GO:0065009 | Regulation of molecular function                           | Biological process | 9  | Calm3, Hdgf, Tmed2, Rps3, Actb, Hsp90b1, Psm6, Dkc1, Eif2s1              |
| 5 | GO:0010629 | Negative regulation of gene expression                     | Biological process | 9  | Rps14, Nkap, Hdgf, Sars1, Sumo2, Rps3, Eif2s1, Vim, Hist1h2ail1          |
| 4 | GO:0006793 | Phosphorus metabolic process                               | Biological process | 9  | Pkn3, Sptbn1, HSP90AA1, Calm3, Myoc, Rps3, Hsp90b1, Hspa9, Eif2s1        |
| 5 | GO:0006796 | Phosphate-containing compound metabolic process            | Biological process | 9  | Pkn3, Sptbn1, HSP90AA1, Calm3, Myoc, Rps3, Hsp90b1, Hspa9, Eif2s1        |
| 3 | GO:0050793 | Regulation of developmental process                        | Biological process | 9  | Rlc-a, Vim, Sars1, Chrd, Hspa9, Rab11a, Nkap, Rps19, Myoc                |
| 3 | GO:0006928 | Movement of cell or subcellular component                  | Biological process | 9  | Rps19, B3gnt2, Pkn3, Rab11a, Rab1a, Myoc, Chrd, Actb, Vim                |
| 2 | GO:0040011 | Locomotion                                                 | Biological process | 9  | Rps19, B3gnt2, Pkn3, Rab11a, Rab1a, Myoc, Chrd, Actb, Vim                |
| 4 | GO:0071495 | Cellular response to endogenous stimulus                   | Biological process | 9  | Chrd, Htra1, Vim, Hsp90b1, Rplp0, Col2a1, Actb, Rps3, Myoc               |
| 4 | GO:1901575 | Organic substance catabolic process                        | Biological process | 8  | Uba1, Hsp90b1, Psmc6, Sumo2, Psm6, Vim, HSP90AA1, Dkc1                   |
| 5 | GO:0071702 | Organic substance transport                                | Biological process | 8  | Hspa9, Rab1a, Rab11a, Tmed2, Hsp90b1, Sptbn1, HSP90AA1, Nkap             |
| 5 | GO:0071705 | Nitrogen compound transport                                | Biological process | 8  | Hspa9, Rab1a, Rab11a, Tmed2, Hsp90b1, Sptbn1, HSP90AA1, Nkap             |
| 6 | GO:0042886 | Amide transport                                            | Biological process | 8  | Hspa9, Rab1a, Rab11a, Tmed2, Hsp90b1, Sptbn1, HSP90AA1, Nkap             |
| 5 | GO:0015031 | Protein transport                                          | Biological process | 8  | Hspa9, Rab1a, Rab11a, Tmed2, Hsp90b1, Sptbn1, HSP90AA1, Nkap             |
| 6 | GO:0015833 | Peptide transport                                          | Biological process | 8  | Hspa9, Rab1a, Rab11a, Tmed2, Hsp90b1, Sptbn1, HSP90AA1, Nkap             |
| 5 | GO:0009057 | Macromolecule catabolic process                            | Biological process | 8  | Uba1, Hsp90b1, Psmc6, Sumo2, Psm6, Vim, HSP90AA1, Dkc1                   |
| 4 | GO:0051172 | Negative regulation of nitrogen compound metabolic process | Biological process | 8  | Rps14, Nkap, Hdgf, Sars1, Sumo2, Rps3, Eif2s1, Dkc1                      |
| 4 | GO:0031324 | Negative regulation of cellular metabolic process          | Biological process | 8  | Rps14, Nkap, Hdgf, Sars1, Sumo2, Rps3, Eif2s1, Dkc1                      |
| 4 | GO:0033554 | Cellular response to stress                                | Biological process | 8  | Rps3, Uba1, Hsp90b1, Psmc6, Eif2s1, Rpl17, Rps25, Hspa9                  |
| 4 | GO:0022613 | Ribonucleoprotein complex biogenesis                       | Biological process | 8  | Rplp0, Rpl34, Rps14, Rps19, Rps5, Rps25, Dkc1, Rpl35                     |
| 5 | GO:0042254 | Ribosome biogenesis                                        | Biological process | 8  | Rps14, Rps19, Rps5, Rps25, Dkc1, Rpl35, Rplp0, Rpl34                     |
| 4 | GO:1901698 | Response to nitrogen compound                              | Biological process | 8  | Calm3, Rps12, Hsp90b1, Psmc6, Hspa9, Rplp0, Col2a1, Actb                 |
| 4 | GO:1901700 | Response to oxygen-containing compound                     | Biological process | 8  | Vim, Rps4x, Hspa9, Rps3, Col2a1, Hsp90b1, Rplp0, Actb                    |
| 5 | GO:0010243 | Response to organonitrogen compound                        | Biological process | 8  | Calm3, Hsp90b1, Psmc6, Hspa9, Rplp0, Col2a1, Actb, Rps12                 |
| 4 | GO:0042493 | Response to drug                                           | Biological process | 8  | Calm3, Rps4x, Hspa9, Rps3, Col2a1, Hsp90b1, Actb, Rplp0                  |
| 3 | GO:0009628 | Response to abiotic stimulus                               | Biological process | 8  | Hsp90b1, Actb, Col2a1, Vim, HSP90AA1, Hspa9, Eif2s1, Rpl35               |
| 3 | GO:0032879 | Regulation of localization                                 | Biological process | 8  | Rab11a, Calm3, Myoc, Chrd, Sptbn1, Vim, Nkap, Dkc1                       |
| 5 | GO:0006508 | Proteolysis                                                | Biological process | 8  | Cpd, Uba1, Hsp90b1, Psmc6, Sumo2, Psm6, Rps3, Htra1                      |
| 3 | GO:0048870 | Cell motility                                              | Biological process | 8  | Rps19, Pkn3, Rab11a, Rab1a, Myoc, Chrd, Vim, Actb                        |
| 3 | GO:0051674 | Localization of cell                                       | Biological process | 8  | Rps19, Pkn3, Rab11a, Rab1a, Myoc, Chrd, Actb, Vim                        |
| 7 | GO:0006366 | Transcription by RNA polymerase II                         | Biological process | 8  | Rps14, Nkap, Hdgf, Sars1, Chrd, Htra1, Psmc6, Sumo2                      |
| 7 | GO:0006357 | Regulation of transcription by RNA polymerase II           | Biological process | 8  | Rps14, Nkap, Hdgf, Sars1, Chrd, Htra1, Psmc6, Sumo2                      |
| 2 | GO:0008283 | Cell proliferation                                         | Biological process | 8  | Chrd, Rps4x, Dkc1, Rps3, Htra1, Vim, Nkap, Tgfb1                         |
| 5 | GO:0034097 | Response to cytokine                                       | Biological process | 8  | Vim, Hspa9, Cpd, Tuba1b, Rplp0, Rps3, Col2a1, B3gnt2                     |
| 6 | GO:0071345 | Cellular response to cytokine stimulus                     | Biological process | 8  | Vim, Hspa9, Cpd, Tuba1b, Rplp0, Rps3, Col2a1, B3gnt2                     |
| 3 | GO:0023051 | Regulation of signaling                                    | Biological process | 8  | Hdgf, Myoc, Chrd, Rps3, Htra1, Rab11a, Calm3, Col2a1                     |
| 3 | GO:0048583 | Regulation of response to stimulus                         | Biological process | 8  | Hdgf, Myoc, Chrd, Rps3, Htra1, Rps19, Calm3, Col2a1                      |
| 4 | GO:0010646 | Regulation of cell communication                           | Biological process | 8  | Hdgf, Myoc, Chrd, Rps3, Htra1, Rab11a, Calm3, Col2a1                     |
| 5 | GO:0007399 | Nervous system development                                 | Biological process | 8  | Tmed2, Actb, B3gnt2, Col2a1, Chrd, Vim, Myoc, Rab11a                     |
| 4 | GO:0051649 | Establishment of localization in cell                      | Biological process | 7  | Tmed2, Hspa9, Rab1a, Rab11a, Calm3, Hsp90b1, Nkap                        |
| 4 | GO:0046907 | Intracellular transport                                    | Biological process | 7  | Hspa9, Rab1a, Rab11a, Tmed2, Hsp90b1, Nkap, Calm3                        |
| 4 | GO:0009891 | Positive regulation of biosynthetic process                | Biological process | 7  | Vim, Rps4x, Dkc1, HSP90AA1, Psmc6, Sumo2, Hdgf                           |

|   |            |                                                                         |                    |   |                                                        |
|---|------------|-------------------------------------------------------------------------|--------------------|---|--------------------------------------------------------|
| 5 | GO:0051247 | Positive regulation of protein metabolic process                        | Biological process | 7 | Vim, Rps4x, Sumo2, Calm3, Rps3, Psmc6, Rab1a           |
| 5 | GO:0044265 | Cellular macromolecule catabolic process                                | Biological process | 7 | Uba1, Hsp90b1, Psmc6, Sumo2, Psm6, Vim, Dkc1           |
| 5 | GO:0031328 | Positive regulation of cellular biosynthetic process                    | Biological process | 7 | Vim, Rps4x, Dkc1, HSP90AA1, Psmc6, Sumo2, Hdgf         |
| 5 | GO:0010628 | Positive regulation of gene expression                                  | Biological process | 7 | Vim, Rps4x, Psmc6, Sumo2, Hdgf, Rps3, Tmed2            |
| 5 | GO:0070925 | Organelle assembly                                                      | Biological process | 7 | Rps14, Rps19, Rps5, Rps25, Rab1a, Rab11a, Rps3         |
| 4 | GO:0009890 | Negative regulation of biosynthetic process                             | Biological process | 7 | Rps14, Nkap, Hdgf, Sars1, Sumo2, Rps3, Eif2s1          |
| 5 | GO:0045934 | Negative regulation of nucleobase-containing compound metabolic process | Biological process | 7 | Rps14, Nkap, Hdgf, Sars1, Sumo2, Rps3, Dkc1            |
| 5 | GO:0010558 | Negative regulation of macromolecule biosynthetic process               | Biological process | 7 | Rps14, Nkap, Hdgf, Sars1, Sumo2, Rps3, Eif2s1          |
| 5 | GO:0031327 | Negative regulation of cellular biosynthetic process                    | Biological process | 7 | Rps14, Nkap, Hdgf, Sars1, Sumo2, Rps3, Eif2s1          |
| 6 | GO:2000113 | Negative regulation of cellular macromolecule biosynthetic process      | Biological process | 7 | Rps14, Nkap, Hdgf, Sars1, Sumo2, Rps3, Eif2s1          |
| 2 | GO:0002376 | Immune system process                                                   | Biological process | 7 | Rps19, Rps3, Nkap, Rps14, Hspa9, Htra1, Vim            |
| 5 | GO:0007010 | Cytoskeleton organization                                               | Biological process | 7 | Tuba1b, Rab11a, Rps3, Hsp90b1, Vim, Myoc, Sptbn1, Actb |
| 4 | GO:0009991 | Response to extracellular stimulus                                      | Biological process | 7 | Vim, Rpl17, Rps25, Eif2s1, Hspa9, Col2a1, Hsp90b1      |
| 5 | GO:0031667 | Response to nutrient levels                                             | Biological process | 7 | Vim, Rpl17, Rps25, Eif2s1, Hspa9, Col2a1, Hsp90b1      |
| 6 | GO:0016310 | Phosphorylation                                                         | Biological process | 7 | Pkn3, Sptbn1, HSP90AA1, Myoc, Rps3, Hspa9, Eif2s1      |
| 7 | GO:0006468 | Protein phosphorylation                                                 | Biological process | 7 | Sptbn1, HSP90AA1, Myoc, Rps3, Hspa9, Eif2s1, Pkn3      |
| 4 | GO:0016477 | Cell migration                                                          | Biological process | 7 | Rps19, Pkn3, Rab11a, Myoc, Chrd, Vim, Rab1a            |
| 4 | GO:0042592 | Homeostatic process                                                     | Biological process | 7 | Col2a1, Dkc1, Calm3, Rps14, Rps19, Hspa9, Myoc         |
| 4 | GO:0048468 | Cell development                                                        | Biological process | 7 | Actb, B3gnt2, Vim, Myoc, Rab11a, Rab1a, Rps19          |
| 4 | GO:0032989 | Cellular component morphogenesis                                        | Biological process | 7 | Actb, B3gnt2, Rlc-a, Rab1a, Rab11a, Vim, Myoc          |
| 5 | GO:0000902 | Cell morphogenesis                                                      | Biological process | 7 | Actb, B3gnt2, Rlc-a, Rab1a, Rab11a, Vim, Myoc          |
| 4 | GO:0045595 | Regulation of cell differentiation                                      | Biological process | 7 | Vim, Hspa9, Chrd, Rab11a, Nkap, Rps19, Myoc            |
| 4 | GO:0097435 | Supramolecular fiber organization                                       | Biological process | 7 | Col2a1, Rab11a, Rps3, Hsp90b1, Vim, Myoc, Sptbn1       |
| 4 | GO:0009966 | Regulation of signal transduction                                       | Biological process | 7 | Hdgf, Myoc, Chrd, Rps3, Htra1, Calm3, Col2a1           |
| 3 | GO:0048585 | Negative regulation of response to stimulus                             | Biological process | 7 | Chrd, Htra1, Myoc, Rps3, Rps19, Calm3, Col2a1          |
| 4 | GO:0050790 | Regulation of catalytic activity                                        | Biological process | 6 | Calm3, Tmed2, Rps3, Hsp90b1, Dkc1, Psm6                |
| 5 | GO:1901565 | Organonitrogen compound catabolic process                               | Biological process | 6 | Uba1, Hsp90b1, Psmc6, Sumo2, Psm6, HSP90AA1            |
| 5 | GO:0010557 | Positive regulation of macromolecule biosynthetic process               | Biological process | 6 | Vim, Rps4x, Dkc1, Psmc6, Sumo2, Hdgf                   |
| 5 | GO:0032270 | Positive regulation of cellular protein metabolic process               | Biological process | 6 | Vim, Rps4x, Sumo2, Calm3, Rps3, Psmc6                  |
| 5 | GO:0030163 | Protein catabolic process                                               | Biological process | 6 | Uba1, Hsp90b1, Psmc6, Sumo2, Psm6, HSP90AA1            |
| 5 | GO:0006886 | Intracellular protein transport                                         | Biological process | 6 | Hspa9, Hsp90b1, Rab11a, Nkap, Rab1a, Tmed2             |
| 3 | GO:0007049 | Cell cycle                                                              | Biological process | 6 | Calm3, Tuba1b, Sptbn1, Rab11a, Rps3, Rpl17             |
| 3 | GO:0051240 | Positive regulation of multicellular organismal process                 | Biological process | 6 | Rab11a, Rps3, Nkap, Vim, Rps19, Sptbn1                 |
| 5 | GO:0051253 | Negative regulation of RNA metabolic process                            | Biological process | 6 | Rps14, Nkap, Hdgf, Sars1, Sumo2, Dkc1                  |
| 6 | GO:0010608 | Posttranscriptional regulation of gene expression                       | Biological process | 6 | Rps14, Vim, Rps4x, Rps3, Eif2s1, Dkc1                  |
| 7 | GO:0034660 | NcRNA metabolic process                                                 | Biological process | 6 | Dkc1, Rps14, Rps19, Rpl35, Yars, Sars1                 |
| 4 | GO:0010035 | Response to inorganic substance                                         | Biological process | 6 | Calm3, Vim, Rplp0, Rps3, Hsp90b1, Eif2s1               |
| 4 | GO:0051130 | Positive regulation of cellular component organization                  | Biological process | 6 | Rps3, Dkc1, Rab11a, Psmc6, Myoc, Nkap                  |
| 4 | GO:2000026 | Regulation of multicellular organismal development                      | Biological process | 6 | Vim, Sars1, Chrd, Hspa9, Rab11a, Nkap                  |
| 5 | GO:0014070 | Response to organic cyclic compound                                     | Biological process | 6 | Vim, Hspa9, Col2a1, Hsp90b1, Rplp0, Actb               |
| 4 | GO:0009636 | Response to toxic substance                                             | Biological process | 6 | Calm3, Rps4x, Rps3, Col2a1, Actb, Hspa9                |
| 5 | GO:0000904 | Cell morphogenesis involved in differentiation                          | Biological process | 6 | Actb, B3gnt2, Rab1a, Rab11a, Vim, Myoc                 |
| 3 | GO:0042127 | Regulation of cell proliferation                                        | Biological process | 6 | Chrd, Rps4x, Dkc1, Rps3, Htra1, Vim                    |
| 3 | GO:0008284 | Positive regulation of cell proliferation                               | Biological process | 6 | Chrd, Rps3, Htra1, Vim, Rps4x, Dkc1                    |
| 2 | GO:0022610 | Biological adhesion                                                     | Biological process | 6 | Myoc, Tgfb1, Rab1a, Rps3, Chrd, Nkap                   |
| 3 | GO:0007155 | Cell adhesion                                                           | Biological process | 6 | Myoc, Rab1a, Rps3, Chrd, Nkap, Tgfb1                   |
| 5 | GO:0007167 | Enzyme linked receptor protein signaling pathway                        | Biological process | 6 | Angptl1, Sptbn1, Chrd, Htra1, Myoc, Vim                |
| 5 | GO:0070848 | Response to growth factor                                               | Biological process | 6 | Chrd, Htra1, Vim, Col2a1, Rps3, Myoc                   |
| 6 | GO:0071363 | Cellular response to growth factor stimulus                             | Biological process | 6 | Chrd, Htra1, Vim, Col2a1, Rps3, Myoc                   |
| 3 | GO:0048646 | Anatomical structure formation involved in morphogenesis                | Biological process | 6 | Tgfb1, Chrd, Tmed2, Sars1, Col2a1, Htra1               |
| 6 | GO:0044257 | Cellular protein catabolic process                                      | Biological process | 5 | Uba1, Hsp90b1, Psmc6, Sumo2, Psm6                      |
| 4 | GO:0060341 | Regulation of cellular localization                                     | Biological process | 5 | Calm3, Sptbn1, Rab11a, Nkap, Dkc1                      |
| 5 | GO:0016192 | Vesicle-mediated transport                                              | Biological process | 5 | Tmed2, Rab11a, Rab1a, Sptbn1, Calm3                    |
| 6 | GO:0033365 | Protein localization to organelle                                       | Biological process | 5 | Hdgf, Rab11a, Calm3, Nkap, Dkc1                        |
| 5 | GO:0045935 | Positive regulation of nucleobase-containing compound metabolic process | Biological process | 5 | Rps3, Dkc1, Psmc6, Sumo2, Hdgf                         |

|   |            |                                                                   |                    |   |                                       |
|---|------------|-------------------------------------------------------------------|--------------------|---|---------------------------------------|
| 6 | GO:0043632 | Modification-dependent macromolecule catabolic process            | Biological process | 5 | Uba1, Hsp90b1, Psmc6, Sumo2, Psm6     |
| 6 | GO:0051603 | Proteolysis involved in cellular protein catabolic process        | Biological process | 5 | Uba1, Hsp90b1, Psmc6, Sumo2, Psm6     |
| 7 | GO:0019941 | Modification-dependent protein catabolic process                  | Biological process | 5 | Uba1, Hsp90b1, Psmc6, Sumo2, Psm6     |
| 8 | GO:0006511 | Ubiquitin-dependent protein catabolic process                     | Biological process | 5 | Hsp90b1, Psmc6, Sumo2, Psm6, Uba1     |
| 5 | GO:0046903 | Secretion                                                         | Biological process | 5 | Rab11a, Rplp0, Rab1a, Sptbn1, Calm3   |
| 3 | GO:0022402 | Cell cycle process                                                | Biological process | 5 | Calm3, Sptbn1, Rab11a, Rps3, Rpl17    |
| 5 | GO:0034248 | Regulation of cellular amide metabolic process                    | Biological process | 5 | Rps14, Vim, Rps4x, Rps3, Eif2s1       |
| 6 | GO:0006417 | Regulation of translation                                         | Biological process | 5 | Vim, Rps4x, Rps3, Eif2s1, Rps14       |
| 4 | GO:0000278 | Mitotic cell cycle                                                | Biological process | 5 | Calm3, Sptbn1, Rab11a, Rpl17, Tuba1b  |
| 6 | GO:1902679 | Negative regulation of RNA biosynthetic process                   | Biological process | 5 | Rps14, Nkap, Hdgf, Sars1, Sumo2       |
| 6 | GO:0045892 | Negative regulation of transcription, DNA-templated               | Biological process | 5 | Rps14, Nkap, Hdgf, Sars1, Sumo2       |
| 7 | GO:1903507 | Negative regulation of nucleic acid-templated transcription       | Biological process | 5 | Rps14, Nkap, Hdgf, Sars1, Sumo2       |
| 6 | GO:0072657 | Protein localization to membrane                                  | Biological process | 5 | Sptbn1, Rab11a, Tmed2, Rlc-a, Calm3   |
| 2 | GO:0051704 | Multi-organism process                                            | Biological process | 5 | Tmed2, Rab1a, Rps19, Vim, Htra1       |
| 5 | GO:0033043 | Regulation of organelle organization                              | Biological process | 5 | Rps3, Dkc1, Myoc, Sptbn1, Nkap        |
| 3 | GO:0008219 | Cell death                                                        | Biological process | 5 | Rps3, Hsp90b1, Hspa9, Eif2s1, Col2a1  |
| 3 | GO:0002682 | Regulation of immune system process                               | Biological process | 5 | Rps3, Hspa9, Nkap, Htra1, Rps19       |
| 4 | GO:0010941 | Regulation of cell death                                          | Biological process | 5 | Hsp90b1, Rps3, Hspa9, Eif2s1, Col2a1  |
| 4 | GO:0035556 | Intracellular signal transduction                                 | Biological process | 5 | Calm3, Myoc, Rab1a, Rab11a, Rps3      |
| 4 | GO:0061024 | Membrane organization                                             | Biological process | 5 | Sptbn1, Myoc, Rab1a, Calm3, Rab11a    |
| 6 | GO:0031399 | Regulation of protein modification process                        | Biological process | 5 | Rps3, Calm3, Sumo2, Myoc, Hsp90b1     |
| 3 | GO:0051241 | Negative regulation of multicellular organismal process           | Biological process | 5 | Vim, Sars1, Chrd, Hspa9, Rps19        |
| 4 | GO:0022603 | Regulation of anatomical structure morphogenesis                  | Biological process | 5 | Rlc-a, Sars1, Rab11a, Vim, Myoc       |
| 5 | GO:1901701 | Cellular response to oxygen-containing compound                   | Biological process | 5 | Rps3, Col2a1, Hsp90b1, Rplp0, Actb    |
| 4 | GO:0031668 | Cellular response to extracellular stimulus                       | Biological process | 5 | Rpl17, Rps25, Eif2s1, Col2a1, Hsp90b1 |
| 4 | GO:0071496 | Cellular response to external stimulus                            | Biological process | 5 | Col2a1, Rpl17, Rps25, Eif2s1, Hsp90b1 |
| 5 | GO:0031669 | Cellular response to nutrient levels                              | Biological process | 5 | Rpl17, Rps25, Eif2s1, Col2a1, Hsp90b1 |
| 5 | GO:0035690 | Cellular response to drug                                         | Biological process | 5 | Rps3, Col2a1, Hsp90b1, Actb, Rplp0    |
| 5 | GO:0022008 | Neurogenesis                                                      | Biological process | 5 | Actb, B3gnt2, Vim, Myoc, Rab11a       |
| 4 | GO:0030030 | Cell projection organization                                      | Biological process | 5 | Actb, B3gnt2, Vim, Myoc, Rab11a       |
| 5 | GO:0120036 | Plasma membrane bounded cell projection organization              | Biological process | 5 | Actb, B3gnt2, Vim, Myoc, Rab11a       |
| 6 | GO:0048699 | Generation of neurons                                             | Biological process | 5 | Actb, B3gnt2, Vim, Myoc, Rab11a       |
| 2 | GO:0040007 | Growth                                                            | Biological process | 5 | Htra1, Col2a1, Tmed2, Vim, Rab11a     |
| 5 | GO:0030182 | Neuron differentiation                                            | Biological process | 5 | Actb, B3gnt2, Vim, Myoc, Rab11a       |
| 5 | GO:0048666 | Neuron development                                                | Biological process | 5 | Actb, B3gnt2, Vim, Myoc, Rab11a       |
| 6 | GO:0031175 | Neuron projection development                                     | Biological process | 5 | Actb, B3gnt2, Vim, Rab11a, Myoc       |
| 4 | GO:0009888 | Tissue development                                                | Biological process | 5 | Col2a1, Chrd, Tmed2, Tgfb1, Vim       |
| 3 | GO:0023057 | Negative regulation of signaling                                  | Biological process | 5 | Chrd, Htra1, Myoc, Calm3, Col2a1      |
| 4 | GO:0010648 | Negative regulation of cell communication                         | Biological process | 5 | Chrd, Htra1, Myoc, Calm3, Col2a1      |
| 4 | GO:0009968 | Negative regulation of signal transduction                        | Biological process | 5 | Chrd, Htra1, Myoc, Calm3, Col2a1      |
| 4 | GO:0051049 | Regulation of transport                                           | Biological process | 4 | Calm3, Rab11a, Sptbn1, Nkap           |
| 4 | GO:0032880 | Regulation of protein localization                                | Biological process | 4 | Rab11a, Sptbn1, Nkap, Dkc1            |
| 5 | GO:0070201 | Regulation of establishment of protein localization               | Biological process | 4 | Rab11a, Sptbn1, Nkap, Dkc1            |
| 3 | GO:1903829 | Positive regulation of cellular protein localization              | Biological process | 4 | Rab11a, Sptbn1, Nkap, Dkc1            |
| 5 | GO:1903827 | Regulation of cellular protein localization                       | Biological process | 4 | Sptbn1, Rab11a, Nkap, Dkc1            |
| 5 | GO:0072594 | Establishment of protein localization to organelle                | Biological process | 4 | Calm3, Nkap, Dkc1, Rab11a             |
| 4 | GO:0009894 | Regulation of catabolic process                                   | Biological process | 4 | Sumo2, Vim, Dkc1, Psmc6               |
| 4 | GO:0044093 | Positive regulation of molecular function                         | Biological process | 4 | Rps3, Calm3, Dkc1, Eif2s1             |
| 3 | GO:0032940 | Secretion by cell                                                 | Biological process | 4 | Rab11a, Rab1a, Sptbn1, Calm3          |
| 5 | GO:0031329 | Regulation of cellular catabolic process                          | Biological process | 4 | Sumo2, Vim, Dkc1, Psmc6               |
| 5 | GO:0051276 | Chromosome organization                                           | Biological process | 4 | Hist1h2ail1, Pkn3, Dkc1, Rab11a       |
| 5 | GO:0051336 | Regulation of hydrolase activity                                  | Biological process | 4 | Tmed2, Rps3, Calm3, Hsp90b1           |
| 6 | GO:0010498 | Proteasomal protein catabolic process                             | Biological process | 4 | Hsp90b1, Psmc6, Sumo2, Psm6           |
| 7 | GO:0043161 | Proteasome-mediated ubiquitin-dependent protein catabolic process | Biological process | 4 | Hsp90b1, Psmc6, Sumo2, Psm6           |
| 3 | GO:0007017 | Microtubule-based process                                         | Biological process | 4 | Tuba1b, Rab11a, Rps3, Rab1a           |
| 3 | GO:0001816 | Cytokine production                                               | Biological process | 4 | Rps3, Rab1a, Sptbn1, Sars1            |
| 4 | GO:0044092 | Negative regulation of molecular function                         | Biological process | 4 | Tmed2, Actb, Calm3, Eif2s1            |

|   |            |                                                           |                    |   |                               |
|---|------------|-----------------------------------------------------------|--------------------|---|-------------------------------|
| 6 | GO:0006396 | Rna processing                                            | Biological process | 4 | Dkc1, Rps14, Rps19, Rpl35     |
| 3 | GO:0002520 | Immune system development                                 | Biological process | 4 | Nkap, Rps14, Rps19, Hspa9     |
| 3 | GO:0051301 | Cell division                                             | Biological process | 4 | Sptbn1, Rab11a, Calm3, Rps3   |
| 4 | GO:0048534 | Hematopoietic or lymphoid organ development               | Biological process | 4 | Nkap, Rps14, Rps19, Hspa9     |
| 4 | GO:0010256 | Endomembrane system organization                          | Biological process | 4 | Sptbn1, Rab1a, Tmed2, Rab11a  |
| 4 | GO:1903047 | Mitotic cell cycle process                                | Biological process | 4 | Calm3, Sptbn1, Rab11a, Rpl17  |
| 5 | GO:0030097 | Hemopoiesis                                               | Biological process | 4 | Rps14, Rps19, Hspa9, Nkap     |
| 5 | GO:0071826 | Ribonucleoprotein complex subunit organization            | Biological process | 4 | Rps14, Rps19, Rps5, Rps25     |
| 5 | GO:0022618 | Ribonucleoprotein complex assembly                        | Biological process | 4 | Rps14, Rps19, Rps5, Rps25     |
| 6 | GO:0006364 | Rrna processing                                           | Biological process | 4 | Dkc1, Rps14, Rps19, Rpl35     |
| 7 | GO:0002181 | Cytoplasmic translation                                   | Biological process | 4 | Rps3, Rpl17, Rpl27a, Rplp0    |
| 7 | GO:0034470 | Ncrna processing                                          | Biological process | 4 | Dkc1, Rps14, Rps19, Rpl35     |
| 8 | GO:0016072 | Rrna metabolic process                                    | Biological process | 4 | Dkc1, Rps14, Rps19, Rpl35     |
| 4 | GO:0051656 | Establishment of organelle localization                   | Biological process | 4 | Tmed2, Rab11a, Rab1a, Calm3   |
| 4 | GO:0051640 | Organelle localization                                    | Biological process | 4 | Tmed2, Rab11a, Rab1a, Calm3   |
| 5 | GO:0042274 | Ribosomal small subunit biogenesis                        | Biological process | 4 | Rps14, Rps19, Rps5, Rps25     |
| 6 | GO:0042255 | Ribosome assembly                                         | Biological process | 4 | Rps14, Rps19, Rps5, Rps25     |
| 6 | GO:0065004 | Protein-DNA complex assembly                              | Biological process | 4 | Hist1h2ail1, Pkn3, Psmc6      |
| 6 | GO:0000028 | Ribosomal small subunit assembly                          | Biological process | 4 | Rps14, Rps19, Rps5, Rps25     |
| 5 | GO:0030099 | Myeloid cell differentiation                              | Biological process | 4 | Rps14, Rps19, Hspa9, Nkap     |
| 5 | GO:0010038 | Response to metal ion                                     | Biological process | 4 | Calm3, Vim, Hsp90b1, Eif2s1   |
| 5 | GO:0051650 | Establishment of vesicle localization                     | Biological process | 4 | Tmed2, Rab1a, Rab11a, Calm3   |
| 5 | GO:0051648 | Vesicle localization                                      | Biological process | 4 | Tmed2, Rab1a, Rab11a, Calm3   |
| 6 | GO:1990778 | Protein localization to cell periphery                    | Biological process | 4 | Sptbn1, Rab11a, Tmed2, Rlc-a  |
| 7 | GO:0000122 | Negative regulation of transcription by RNA polymerase II | Biological process | 4 | Rps14, Nkap, Hdgf, Sars1      |
| 7 | GO:0072659 | Protein localization to plasma membrane                   | Biological process | 4 | Sptbn1, Rab11a, Tmed2, Rlc-a  |
| 3 | GO:0044087 | Regulation of cellular component biogenesis               | Biological process | 4 | Rps3, Psmc6, Myoc, Sptbn1     |
| 5 | GO:0010638 | Positive regulation of organelle organization             | Biological process | 4 | Rps3, Dkc1, Myoc, Nkap        |
| 3 | GO:0048584 | Positive regulation of response to stimulus               | Biological process | 4 | Myoc, Rps3, Rps19, Calm3      |
| 4 | GO:0012501 | Programmed cell death                                     | Biological process | 4 | Rps3, Hsp90b1, Eif2s1, Col2a1 |
| 3 | GO:0051094 | Positive regulation of developmental process              | Biological process | 4 | Rab11a, Nkap, Vim, Myoc       |
| 5 | GO:0006915 | Apoptotic process                                         | Biological process | 4 | Hsp90b1, Rps3, Eif2s1, Col2a1 |
| 5 | GO:0043067 | Regulation of programmed cell death                       | Biological process | 4 | Hsp90b1, Rps3, Eif2s1, Col2a1 |
| 6 | GO:0042981 | Regulation of apoptotic process                           | Biological process | 4 | Hsp90b1, Rps3, Eif2s1, Col2a1 |
| 4 | GO:0007584 | Response to nutrient                                      | Biological process | 4 | Vim, Hspa9, Col2a1, Hsp90b1   |
| 3 | GO:0048589 | Developmental growth                                      | Biological process | 4 | Col2a1, Tmed2, Vim, Rab11a    |
| 3 | GO:0030029 | Actin filament-based process                              | Biological process | 4 | Hsp90b1, Myoc, Sptbn1, Actb   |
| 3 | GO:0007267 | Cell-cell signaling                                       | Biological process | 4 | Rab1a, Myoc, Rab11a, Calm3    |
| 4 | GO:0030036 | Actin cytoskeleton organization                           | Biological process | 4 | Hsp90b1, Myoc, Sptbn1, Actb   |
| 5 | GO:0051174 | Regulation of phosphorus metabolic process                | Biological process | 4 | Calm3, Myoc, Rps3, Hsp90b1    |
| 5 | GO:0048858 | Cell projection morphogenesis                             | Biological process | 4 | Actb, B3gnt2, Rab11a, Vim     |
| 5 | GO:0032990 | Cell part morphogenesis                                   | Biological process | 4 | Actb, B3gnt2, Rab11a, Vim     |
| 6 | GO:0019220 | Regulation of phosphate metabolic process                 | Biological process | 4 | Calm3, Myoc, Rps3, Hsp90b1    |
| 6 | GO:0120039 | Plasma membrane bounded cell projection morphogenesis     | Biological process | 4 | Actb, B3gnt2, Rab11a, Vim     |
| 7 | GO:0048812 | Neuron projection morphogenesis                           | Biological process | 4 | Actb, B3gnt2, Rab11a, Vim     |
| 4 | GO:0045597 | Positive regulation of cell differentiation               | Biological process | 4 | Rab11a, Nkap, Vim, Myoc       |
| 4 | GO:0006952 | Defense response                                          | Biological process | 4 | Rab1a, Rps19, Htra1, Vim      |
| 6 | GO:0048667 | Cell morphogenesis involved in neuron differentiation     | Biological process | 4 | Actb, B3gnt2, Rab11a, Vim     |
| 5 | GO:0022604 | Regulation of cell morphogenesis                          | Biological process | 4 | Rlc-a, Rab11a, Vim, Myoc      |
| 6 | GO:0071407 | Cellular response to organic cyclic compound              | Biological process | 4 | Col2a1, Hsp90b1, Rplp0, Actb  |
| 7 | GO:0061564 | Axon development                                          | Biological process | 4 | Actb, B3gnt2, Rab11a, Vim     |
| 7 | GO:0007409 | Axonogenesis                                              | Biological process | 4 | B3gnt2, Rab11a, Vim, Actb     |
| 3 | GO:0051093 | Negative regulation of developmental process              | Biological process | 4 | Vim, Sars1, Chrd, Hspa9       |
| 5 | GO:0060284 | Regulation of cell development                            | Biological process | 4 | Vim, Rab11a, Rps19, Myoc      |
| 4 | GO:0009314 | Response to radiation                                     | Biological process | 4 | Col2a1, Eif2s1, Rpl35, Vim    |
| 5 | GO:1901699 | Cellular response to nitrogen compound                    | Biological process | 4 | Hsp90b1, Rplp0, Col2a1, Actb  |
| 5 | GO:0071417 | Cellular response to organonitrogen compound              | Biological process | 4 | Hsp90b1, Rplp0, Col2a1, Actb  |
| 4 | GO:0104004 | Cellular response to environmental stimulus               | Biological process | 4 | Col2a1, Eif2s1, Actb, Rpl35   |



|   |            |                                                                          |                    |   |                             |
|---|------------|--------------------------------------------------------------------------|--------------------|---|-----------------------------|
| 4 | GO:0071214 | Cellular response to abiotic stimulus                                    | Biological process | 4 | Col2a1, Eif2s1, Actb, Rpl35 |
| 3 | GO:0040012 | Regulation of locomotion                                                 | Biological process | 4 | Rab11a, Myoc, Chrd, Vim     |
| 4 | GO:0051270 | Regulation of cellular component movement                                | Biological process | 4 | Rab11a, Myoc, Chrd, Vim     |
| 4 | GO:2000145 | Regulation of cell motility                                              | Biological process | 4 | Rab11a, Myoc, Chrd, Vim     |
| 5 | GO:0030334 | Regulation of cell migration                                             | Biological process | 4 | Rab11a, Myoc, Chrd, Vim     |
| 5 | GO:0072359 | Circulatory system development                                           | Biological process | 4 | Tgfb1, Tmed2, Col2a1, Sars1 |
| 6 | GO:0007178 | Transmembrane receptor protein serine/threonine kinase signaling pathway | Biological process | 4 | Sptbn1, Chrd, Htra1, Vim    |
| 3 | GO:0030155 | Regulation of cell adhesion                                              | Biological process | 4 | Myoc, Rps3, Chrd, Nkap      |
| 4 | GO:0035295 | Tube development                                                         | Biological process | 4 | Tgfb1, Tmed2, Sars1, Col2a1 |
| 3 | GO:0045785 | Positive regulation of cell adhesion                                     | Biological process | 4 | Rps3, Nkap, Myoc, Chrd      |
| 3 | GO:0003008 | System process                                                           | Biological process | 4 | Calm3, Col2a1, B3gnt2, Myoc |
| 5 | GO:0001501 | Skeletal system development                                              | Biological process | 4 | Col2a1, Tgfb1, Myoc, Chrd   |
| 3 | GO:0051050 | Positive regulation of transport                                         | Biological process | 3 | Calm3, Sptbn1, Nkap         |
| 3 | GO:1904951 | Positive regulation of establishment of protein localization             | Biological process | 3 | Sptbn1, Nkap, Dkc1          |
| 4 | GO:0043254 | Regulation of protein complex assembly                                   | Biological process | 3 | Rps3, Psmc6, Sptbn1         |
| 5 | GO:0090087 | Regulation of peptide transport                                          | Biological process | 3 | Rab11a, Sptbn1, Nkap        |
| 5 | GO:0043085 | Positive regulation of catalytic activity                                | Biological process | 3 | Rps3, Calm3, Dkc1           |
| 6 | GO:0030162 | Regulation of proteolysis                                                | Biological process | 3 | Sumo2, Psmc6, Rps3          |
| 6 | GO:0051223 | Regulation of protein transport                                          | Biological process | 3 | Sptbn1, Nkap, Rab11a        |
| 3 | GO:0002684 | Positive regulation of immune system process                             | Biological process | 3 | Rps3, Nkap, Rps19           |
| 3 | GO:0006955 | Immune response                                                          | Biological process | 3 | Rps3, Rps19, Vim            |
| 4 | GO:0046677 | Response to antibiotic                                                   | Biological process | 3 | Rps4x, Rps3, HSP90AA1       |
| 5 | GO:0034976 | Response to endoplasmic reticulum stress                                 | Biological process | 3 | Hsp90b1, Psmc6, Eif2s1      |
| 7 | GO:0070647 | Protein modification by small protein conjugation or removal             | Biological process | 3 | Uba1, Sumo2, Rps3           |
| 8 | GO:0032446 | Protein modification by small protein conjugation                        | Biological process | 3 | Uba1, Sumo2, Rps3           |
| 6 | GO:0031401 | Positive regulation of protein modification process                      | Biological process | 3 | Calm3, Sumo2, Rps3          |
| 6 | GO:0045862 | Positive regulation of proteolysis                                       | Biological process | 3 | Sumo2, Psmc6, Rps3          |
| 4 | GO:0000910 | Cytokinesis                                                              | Biological process | 3 | Sptbn1, Rab11a, Calm3       |
| 4 | GO:0001817 | Regulation of cytokine production                                        | Biological process | 3 | Rps3, Sptbn1, Sars1         |
| 5 | GO:0051254 | Positive regulation of RNA metabolic process                             | Biological process | 3 | Psmc6, Sumo2, Hdgf          |
| 5 | GO:0071824 | Protein-DNA complex subunit organization                                 | Biological process | 3 | Hist1h2ail1, Pkn3, Psmc6    |
| 6 | GO:1902680 | Positive regulation of RNA biosynthetic process                          | Biological process | 3 | Psmc6, Sumo2, Hdgf          |
| 6 | GO:0045893 | Positive regulation of transcription, DNA-templated                      | Biological process | 3 | Psmc6, Sumo2, Hdgf          |
| 7 | GO:1903508 | Positive regulation of nucleic acid-templated transcription              | Biological process | 3 | Psmc6, Sumo2, Hdgf          |
| 7 | GO:0045944 | Positive regulation of transcription by RNA polymerase II                | Biological process | 3 | Psmc6, Sumo2, Hdgf          |
| 4 | GO:0000226 | Microtubule cytoskeleton organization                                    | Biological process | 3 | Rab11a, Rps3, Tuba1b        |
| 4 | GO:0051726 | Regulation of cell cycle                                                 | Biological process | 3 | Rab11a, Calm3, Rpl17        |
| 4 | GO:0010564 | Regulation of cell cycle process                                         | Biological process | 3 | Rab11a, Calm3, Rpl17        |
| 4 | GO:0009408 | Response to heat                                                         | Biological process | 3 | Hspa9, Eif2s1, HSP90AA1     |
| 4 | GO:0009266 | Response to temperature stimulus                                         | Biological process | 3 | HSP90AA1, Hspa9, Eif2s1     |
| 5 | GO:0090150 | Establishment of protein localization to membrane                        | Biological process | 3 | Sptbn1, Calm3, Rab11a       |
| 6 | GO:0048193 | Golgi vesicle transport                                                  | Biological process | 3 | Rab1a, Tmed2, Sptbn1        |
| 3 | GO:0002262 | Myeloid cell homeostasis                                                 | Biological process | 3 | Rps14, Rps19, Hspa9         |
| 4 | GO:0034101 | Erythrocyte homeostasis                                                  | Biological process | 3 | Rps14, Rps19, Hspa9         |
| 4 | GO:0044770 | Cell cycle phase transition                                              | Biological process | 3 | Calm3, Rab11a, Rpl17        |
| 4 | GO:0042594 | Response to starvation                                                   | Biological process | 3 | Rpl17, Rps25, Eif2s1        |
| 5 | GO:0030218 | Erythrocyte differentiation                                              | Biological process | 3 | Hspa9, Rps14, Rps19         |
| 5 | GO:0044772 | Mitotic cell cycle phase transition                                      | Biological process | 3 | Calm3, Rab11a, Rpl17        |
| 5 | GO:0009267 | Cellular response to starvation                                          | Biological process | 3 | Rpl17, Rps25, Eif2s1        |
| 5 | GO:1990928 | Response to amino acid starvation                                        | Biological process | 3 | Rpl17, Rps25, Eif2s1        |
| 5 | GO:0048872 | Homeostasis of number of cells                                           | Biological process | 3 | Rps14, Rps19, Hspa9         |
| 6 | GO:0034198 | Cellular response to amino acid starvation                               | Biological process | 3 | Rpl17, Rps25, Eif2s1        |
| 3 | GO:0044089 | Positive regulation of cellular component biogenesis                     | Biological process | 3 | Rps3, Psmc6, Myoc           |
| 2 | GO:0000003 | Reproduction                                                             | Biological process | 3 | Htra1, Tmed2, Vim           |
| 2 | GO:0022414 | Reproductive process                                                     | Biological process | 3 | Htra1, Tmed2, Vim           |
| 3 | GO:0023056 | Positive regulation of signaling                                         | Biological process | 3 | Myoc, Rps3, Calm3           |
| 4 | GO:0010647 | Positive regulation of cell communication                                | Biological process | 3 | Myoc, Rps3, Calm3           |

|   |            |                                                              |                    |   |                        |
|---|------------|--------------------------------------------------------------|--------------------|---|------------------------|
| 4 | GO:0009967 | Positive regulation of signal transduction                   | Biological process | 3 | Myoc, Rps3, Calm3      |
| 4 | GO:0009725 | Response to hormone                                          | Biological process | 3 | Vim, Col2a1, Hspa9     |
| 4 | GO:0060548 | Negative regulation of cell death                            | Biological process | 3 | Hsp90b1, Col2a1, Hspa9 |
| 5 | GO:0007015 | Actin filament organization                                  | Biological process | 3 | Hsp90b1, Myoc, Sptbn1  |
| 5 | GO:0051960 | Regulation of nervous system development                     | Biological process | 3 | Vim, Chrd, Rab11a      |
| 5 | GO:0033993 | Response to lipid                                            | Biological process | 3 | Vim, Col2a1, Rplp0     |
| 4 | GO:0001568 | Blood vessel development                                     | Biological process | 3 | Tgfb1, Sars1, Tmed2    |
| 5 | GO:0001944 | Vasculature development                                      | Biological process | 3 | Tgfb1, Sars1, Tmed2    |
| 5 | GO:0072358 | Cardiovascular system development                            | Biological process | 3 | Tgfb1, Sars1, Tmed2    |
| 5 | GO:0033273 | Response to vitamin                                          | Biological process | 3 | Vim, Hspa9, Col2a1     |
| 3 | GO:0002683 | Negative regulation of immune system process                 | Biological process | 3 | Hspa9, Htra1, Rps19    |
| 3 | GO:0003006 | Developmental process involved in reproduction               | Biological process | 3 | Htra1, Tmed2, Vim      |
| 3 | GO:0009607 | Response to biotic stimulus                                  | Biological process | 3 | Rab1a, Rps19, Htra1    |
| 3 | GO:0051707 | Response to other organism                                   | Biological process | 3 | Rab1a, Rps19, Htra1    |
| 4 | GO:0048608 | Reproductive structure development                           | Biological process | 3 | Htra1, Tmed2, Vim      |
| 4 | GO:0080134 | Regulation of response to stress                             | Biological process | 3 | Rps3, Htra1, Rps19     |
| 4 | GO:0043207 | Response to external biotic stimulus                         | Biological process | 3 | Rab1a, Rps19, Htra1    |
| 5 | GO:0007264 | Small GTPase mediated signal transduction                    | Biological process | 3 | Rab1a, Rab11a, Myoc    |
| 5 | GO:1902903 | Regulation of supramolecular fiber organization              | Biological process | 3 | Rps3, Myoc, Sptbn1     |
| 5 | GO:0010720 | Positive regulation of cell development                      | Biological process | 3 | Rab11a, Vim, Myoc      |
| 5 | GO:0061458 | Reproductive system development                              | Biological process | 3 | Htra1, Tmed2, Vim      |
| 5 | GO:0060429 | Epithelium development                                       | Biological process | 3 | Tmed2, Vim, Col2a1     |
| 5 | GO:0007423 | Sensory organ development                                    | Biological process | 3 | Col2a1, Actb, Vim      |
| 6 | GO:0051493 | Regulation of cytoskeleton organization                      | Biological process | 3 | Rps3, Myoc, Sptbn1     |
| 4 | GO:0045596 | Negative regulation of cell differentiation                  | Biological process | 3 | Vim, Hspa9, Chrd       |
| 4 | GO:0035239 | Tube morphogenesis                                           | Biological process | 3 | Tgfb1, Tmed2, Sars1    |
| 4 | GO:0098542 | Defense response to other organism                           | Biological process | 3 | Rab1a, Rps19, Htra1    |
| 5 | GO:1902531 | Regulation of intracellular signal transduction              | Biological process | 3 | Myoc, Rps3, Calm3      |
| 5 | GO:1902533 | Positive regulation of intracellular signal transduction     | Biological process | 3 | Myoc, Rps3, Calm3      |
| 5 | GO:0001890 | Placenta development                                         | Biological process | 3 | Tmed2, Vim, Htra1      |
| 6 | GO:0007265 | Ras protein signal transduction                              | Biological process | 3 | Rab1a, Rab11a, Myoc    |
| 4 | GO:0051129 | Negative regulation of cellular component organization       | Biological process | 3 | Vim, Myoc, Sptbn1      |
| 5 | GO:0097237 | Cellular response to toxic substance                         | Biological process | 3 | Rps3, Col2a1, Actb     |
| 6 | GO:0010769 | Regulation of cell morphogenesis involved in differentiation | Biological process | 3 | Rab11a, Vim, Myoc      |
| 4 | GO:1901135 | Carbohydrate derivative metabolic process                    | Biological process | 3 | Col2a1, B3gnt2, Rab1a  |
| 4 | GO:0009790 | Embryo development                                           | Biological process | 3 | Tmed2, Chrd, Col2a1    |
| 5 | GO:0007417 | Central nervous system development                           | Biological process | 3 | Vim, Chrd, Col2a1      |
| 4 | GO:0009887 | Animal organ morphogenesis                                   | Biological process | 3 | Col2a1, Tmed2, Htra1   |
| 5 | GO:0009100 | Glycoprotein metabolic process                               | Biological process | 3 | Col2a1, B3gnt2, Rab1a  |
| 4 | GO:0048598 | Embryonic morphogenesis                                      | Biological process | 3 | Chrd, Tmed2, Col2a1    |
| 4 | GO:0071772 | Response to BMP                                              | Biological process | 3 | Chrd, Htra1, Col2a1    |
| 5 | GO:0071773 | Cellular response to BMP stimulus                            | Biological process | 3 | Chrd, Htra1, Col2a1    |
| 3 | GO:0001503 | Ossification                                                 | Biological process | 3 | Myoc, Chrd, Col2a1     |
| 3 | GO:0044281 | Small molecule metabolic process                             | Biological process | 2 | Yars, Sars1            |
| 3 | GO:0006457 | Protein folding                                              | Biological process | 2 | Hspa9, Hsp90b1         |
| 3 | GO:0044703 | Multi-organism reproductive process                          | Biological process | 2 | Tmed2, Vim             |
| 4 | GO:0031334 | Positive regulation of protein complex assembly              | Biological process | 2 | Rps3, Psmc6            |
| 4 | GO:0051222 | Positive regulation of protein transport                     | Biological process | 2 | Sptbn1, Nkap           |
| 5 | GO:0055085 | Transmembrane transport                                      | Biological process | 2 | Calm3, HSP90AA1        |
| 3 | GO:0044419 | Interspecies interaction between organisms                   | Biological process | 2 | Rab1a, Rps19           |
| 5 | GO:0042176 | Regulation of protein catabolic process                      | Biological process | 2 | Sumo2, Psmc6           |
| 5 | GO:0006259 | DNA metabolic process                                        | Biological process | 2 | Rps3, Dkc1             |
| 5 | GO:0032386 | Regulation of intracellular transport                        | Biological process | 2 | Nkap, Calm3            |
| 5 | GO:0098657 | Import into cell                                             | Biological process | 2 | Rab1a, Calm3           |
| 6 | GO:0006897 | Endocytosis                                                  | Biological process | 2 | Calm3, Rab1a           |
| 4 | GO:0009896 | Positive regulation of catabolic process                     | Biological process | 2 | Sumo2, Psmc6           |
| 4 | GO:0006082 | Organic acid metabolic process                               | Biological process | 2 | Yars, Sars1            |
| 4 | GO:0032535 | Regulation of cellular component size                        | Biological process | 2 | Rab11a, Sptbn1         |

|   |            |                                                                          |                    |   |                    |
|---|------------|--------------------------------------------------------------------------|--------------------|---|--------------------|
| 4 | GO:0098609 | Cell-cell adhesion                                                       | Biological process | 2 | Rps3, Nkap         |
| 4 | GO:0051962 | Positive regulation of nervous system development                        | Biological process | 2 | Rab11a, Vim        |
| 4 | GO:0090066 | Regulation of anatomical structure size                                  | Biological process | 2 | Rab11a, Sptbn1     |
| 5 | GO:0051248 | Negative regulation of protein metabolic process                         | Biological process | 2 | Rps3, Eif2s1       |
| 5 | GO:0045732 | Positive regulation of protein catabolic process                         | Biological process | 2 | Sumo2, Psmc6       |
| 5 | GO:1901361 | Organic cyclic compound catabolic process                                | Biological process | 2 | Vim, Dkc1          |
| 5 | GO:0032269 | Negative regulation of cellular protein metabolic process                | Biological process | 2 | Rps3, Eif2s1       |
| 5 | GO:0051054 | Positive regulation of DNA metabolic process                             | Biological process | 2 | Rps3, Dkc1         |
| 5 | GO:0051052 | Regulation of DNA metabolic process                                      | Biological process | 2 | Rps3, Dkc1         |
| 5 | GO:0043436 | Oxoacid metabolic process                                                | Biological process | 2 | Yars, Sars1        |
| 5 | GO:0097305 | Response to alcohol                                                      | Biological process | 2 | Rps4x, Rplp0       |
| 5 | GO:0051338 | Regulation of transferase activity                                       | Biological process | 2 | Rps3, Dkc1         |
| 6 | GO:1903362 | Regulation of cellular protein catabolic process                         | Biological process | 2 | Sumo2, Psmc6       |
| 6 | GO:0019752 | Carboxylic acid metabolic process                                        | Biological process | 2 | Yars, Sars1        |
| 6 | GO:0051259 | Protein complex oligomerization                                          | Biological process | 2 | Rps19, Hist1h2ail1 |
| 6 | GO:0051345 | Positive regulation of hydrolase activity                                | Biological process | 2 | Rps3, Calm3        |
| 9 | GO:0016567 | Protein ubiquitination                                                   | Biological process | 2 | Rps3, Uba1         |
| 3 | GO:0032504 | Multicellular organism reproduction                                      | Biological process | 2 | Tmed2, Vim         |
| 3 | GO:0045321 | Leukocyte activation                                                     | Biological process | 2 | Nkap, Rps3         |
| 3 | GO:0001775 | Cell activation                                                          | Biological process | 2 | Nkap, Rps3         |
| 3 | GO:0061919 | Process utilizing autophagic mechanism                                   | Biological process | 2 | Rab1a, HSP90AA1    |
| 3 | GO:0048609 | Multicellular organismal reproductive process                            | Biological process | 2 | Tmed2, Vim         |
| 4 | GO:0045087 | Innate immune response                                                   | Biological process | 2 | Rps19, Vim         |
| 4 | GO:0046649 | Lymphocyte activation                                                    | Biological process | 2 | Nkap, Rps3         |
| 4 | GO:0010942 | Positive regulation of cell death                                        | Biological process | 2 | Eif2s1, Rps3       |
| 4 | GO:0009306 | Protein secretion                                                        | Biological process | 2 | Rab1a, Sptbn1      |
| 4 | GO:1903530 | Regulation of secretion by cell                                          | Biological process | 2 | Sptbn1, Calm3      |
| 4 | GO:0006914 | Autophagy                                                                | Biological process | 2 | Rab1a, HSP90AA1    |
| 4 | GO:0051098 | Regulation of binding                                                    | Biological process | 2 | Actb, Eif2s1       |
| 5 | GO:0044270 | Cellular nitrogen compound catabolic process                             | Biological process | 2 | Vim, Dkc1          |
| 5 | GO:0034250 | Positive regulation of cellular amide metabolic process                  | Biological process | 2 | Vim, Rps4x         |
| 5 | GO:0031331 | Positive regulation of cellular catabolic process                        | Biological process | 2 | Sumo2, Psmc6       |
| 5 | GO:0019439 | Aromatic compound catabolic process                                      | Biological process | 2 | Vim, Dkc1          |
| 5 | GO:0046700 | Heterocycle catabolic process                                            | Biological process | 2 | Vim, Dkc1          |
| 5 | GO:0010562 | Positive regulation of phosphorus metabolic process                      | Biological process | 2 | Calm3, Rps3        |
| 5 | GO:0034655 | Nucleobase-containing compound catabolic process                         | Biological process | 2 | Vim, Dkc1          |
| 5 | GO:0043068 | Positive regulation of programmed cell death                             | Biological process | 2 | Rps3, Eif2s1       |
| 5 | GO:0051046 | Regulation of secretion                                                  | Biological process | 2 | Sptbn1, Calm3      |
| 5 | GO:0043393 | Regulation of protein binding                                            | Biological process | 2 | Actb, Eif2s1       |
| 6 | GO:0045727 | Positive regulation of translation                                       | Biological process | 2 | Vim, Rps4x         |
| 6 | GO:1903364 | Positive regulation of cellular protein catabolic process                | Biological process | 2 | Sumo2, Psmc6       |
| 6 | GO:0045937 | Positive regulation of phosphate metabolic process                       | Biological process | 2 | Calm3, Rps3        |
| 6 | GO:0043065 | Positive regulation of apoptotic process                                 | Biological process | 2 | Rps3, Eif2s1       |
| 6 | GO:0002790 | Peptide secretion                                                        | Biological process | 2 | Rab1a, Sptbn1      |
| 6 | GO:0051347 | Positive regulation of transferase activity                              | Biological process | 2 | Rps3, Dkc1         |
| 7 | GO:1903050 | Regulation of proteolysis involved in cellular protein catabolic process | Biological process | 2 | Sumo2, Psmc6       |
| 7 | GO:0061136 | Regulation of proteasomal protein catabolic process                      | Biological process | 2 | Sumo2, Psmc6       |
| 3 | GO:0051606 | Detection of stimulus                                                    | Biological process | 2 | Calm3, Rps3        |
| 4 | GO:0002694 | Regulation of leukocyte activation                                       | Biological process | 2 | Rps3, Nkap         |
| 4 | GO:0050776 | Regulation of immune response                                            | Biological process | 2 | Rps3, Rps19        |
| 4 | GO:0023061 | Signal release                                                           | Biological process | 2 | Rab1a, Calm3       |
| 4 | GO:0006887 | Exocytosis                                                               | Biological process | 2 | Rab11a, Calm3      |
| 4 | GO:0060627 | Regulation of vesicle-mediated transport                                 | Biological process | 2 | Calm3, Rab11a      |
| 4 | GO:0099536 | Synaptic signaling                                                       | Biological process | 2 | Rab11a, Calm3      |
| 4 | GO:0099177 | Regulation of trans-synaptic signaling                                   | Biological process | 2 | Rab11a, Calm3      |
| 5 | GO:0051249 | Regulation of lymphocyte activation                                      | Biological process | 2 | Rps3, Nkap         |
| 5 | GO:0042110 | T cell activation                                                        | Biological process | 2 | Nkap, Rps3         |

|   |            |                                                                                   |                    |   |                    |
|---|------------|-----------------------------------------------------------------------------------|--------------------|---|--------------------|
| 5 | GO:0007005 | Mitochondrion organization                                                        | Biological process | 2 | Calm3, Nkap        |
| 5 | GO:0031344 | Regulation of cell projection organization                                        | Biological process | 2 | Vim, Rab11a        |
| 5 | GO:0007159 | Leukocyte cell-cell adhesion                                                      | Biological process | 2 | Rps3, Nkap         |
| 5 | GO:0099537 | Trans-synaptic signaling                                                          | Biological process | 2 | Rab11a, Calm3      |
| 5 | GO:0050804 | Modulation of chemical synaptic transmission                                      | Biological process | 2 | Rab11a, Calm3      |
| 5 | GO:0048880 | Sensory system development                                                        | Biological process | 2 | Actb, Vim          |
| 5 | GO:0050769 | Positive regulation of neurogenesis                                               | Biological process | 2 | Rab11a, Vim        |
| 5 | GO:0032271 | Regulation of protein polymerization                                              | Biological process | 2 | Rps3, Sptbn1       |
| 6 | GO:0016311 | Dephosphorylation                                                                 | Biological process | 2 | Calm3, Hsp90b1     |
| 6 | GO:0120035 | Regulation of plasma membrane bounded cell projection organization                | Biological process | 2 | Vim, Rab11a        |
| 6 | GO:0050767 | Regulation of neurogenesis                                                        | Biological process | 2 | Vim, Rab11a        |
| 6 | GO:0045664 | Regulation of neuron differentiation                                              | Biological process | 2 | Vim, Rab11a        |
| 6 | GO:0036503 | ERAD pathway                                                                      | Biological process | 2 | Hsp90b1, Psmc6     |
| 6 | GO:0098916 | Anterograde trans-synaptic signaling                                              | Biological process | 2 | Rab11a, Calm3      |
| 6 | GO:0150063 | Visual system development                                                         | Biological process | 2 | Actb, Vim          |
| 6 | GO:0001654 | Eye development                                                                   | Biological process | 2 | Actb, Vim          |
| 6 | GO:0072655 | Establishment of protein localization to mitochondrion                            | Biological process | 2 | Calm3, Nkap        |
| 7 | GO:1903052 | Positive regulation of proteolysis involved in cellular protein catabolic process | Biological process | 2 | Sumo2, Psmc6       |
| 7 | GO:0035304 | Regulation of protein dephosphorylation                                           | Biological process | 2 | Calm3, Hsp90b1     |
| 7 | GO:1903320 | Regulation of protein modification by small protein conjugation or removal        | Biological process | 2 | Rps3, Sumo2        |
| 7 | GO:0035303 | Regulation of dephosphorylation                                                   | Biological process | 2 | Calm3, Hsp90b1     |
| 7 | GO:0006470 | Protein dephosphorylation                                                         | Biological process | 2 | Calm3, Hsp90b1     |
| 7 | GO:0018193 | Peptidyl-amino acid modification                                                  | Biological process | 2 | Sumo2, HSP90AA1    |
| 7 | GO:1901800 | Positive regulation of proteasomal protein catabolic process                      | Biological process | 2 | Sumo2, Psmc6       |
| 7 | GO:0051258 | Protein polymerization                                                            | Biological process | 2 | Rps3, Sptbn1       |
| 7 | GO:0051262 | Protein tetramerization                                                           | Biological process | 2 | Hist1h2ail1, Rps19 |
| 7 | GO:0030433 | Ubiquitin-dependent ERAD pathway                                                  | Biological process | 2 | Hsp90b1, Psmc6     |
| 7 | GO:0007268 | Chemical synaptic transmission                                                    | Biological process | 2 | Rab11a, Calm3      |
| 7 | GO:0043010 | Camera-type eye development                                                       | Biological process | 2 | Actb, Vim          |
| 7 | GO:0070585 | Protein localization to mitochondrion                                             | Biological process | 2 | Calm3, Nkap        |
| 3 | GO:0007568 | Aging                                                                             | Biological process | 2 | Vim, Eif2s1        |
| 4 | GO:1903706 | Regulation of hemopoiesis                                                         | Biological process | 2 | Hspa9, Nkap        |
| 4 | GO:0002696 | Positive regulation of leukocyte activation                                       | Biological process | 2 | Rps3, Nkap         |
| 4 | GO:0050778 | Positive regulation of immune response                                            | Biological process | 2 | Rps3, Rps19        |
| 4 | GO:0050867 | Positive regulation of cell activation                                            | Biological process | 2 | Rps3, Nkap         |
| 4 | GO:0045787 | Positive regulation of cell cycle                                                 | Biological process | 2 | Rab11a, Rpl17      |
| 4 | GO:0006325 | Chromatin organization                                                            | Biological process | 2 | Hist1h2ail1, Pkn3  |
| 4 | GO:0050663 | Cytokine secretion                                                                | Biological process | 2 | Rab1a, Sptbn1      |
| 4 | GO:0022409 | Positive regulation of cell-cell adhesion                                         | Biological process | 2 | Rps3, Nkap         |
| 4 | GO:1905477 | Positive regulation of protein localization to membrane                           | Biological process | 2 | Rab11a, Sptbn1     |
| 4 | GO:0022407 | Regulation of cell-cell adhesion                                                  | Biological process | 2 | Rps3, Nkap         |
| 4 | GO:0009617 | Response to bacterium                                                             | Biological process | 2 | Rab1a, Rps19       |
| 4 | GO:0043487 | Regulation of RNA stability                                                       | Biological process | 2 | Vim, Dkc1          |
| 5 | GO:0034249 | Negative regulation of cellular amide metabolic process                           | Biological process | 2 | Rps3, Eif2s1       |
| 5 | GO:0051251 | Positive regulation of lymphocyte activation                                      | Biological process | 2 | Rps3, Nkap         |
| 5 | GO:0016050 | Vesicle organization                                                              | Biological process | 2 | Rab11a, Rab1a      |
| 5 | GO:0006974 | Cellular response to DNA damage stimulus                                          | Biological process | 2 | Rps3, Uba1         |
| 5 | GO:0034605 | Cellular response to heat                                                         | Biological process | 2 | Hspa9, Eif2s1      |
| 5 | GO:0001667 | Ameboidal-type cell migration                                                     | Biological process | 2 | Pkn3, Rab11a       |
| 5 | GO:1903039 | Positive regulation of leukocyte cell-cell adhesion                               | Biological process | 2 | Rps3, Nkap         |
| 5 | GO:1903037 | Regulation of leukocyte cell-cell adhesion                                        | Biological process | 2 | Rps3, Nkap         |
| 5 | GO:0009416 | Response to light stimulus                                                        | Biological process | 2 | Eif2s1, Rpl35      |
| 5 | GO:0006888 | ER to Golgi vesicle-mediated transport                                            | Biological process | 2 | Rab1a, Tmed2       |
| 5 | GO:0042742 | Defense response to bacterium                                                     | Biological process | 2 | Rps19, Rab1a       |
| 5 | GO:0051100 | Negative regulation of binding                                                    | Biological process | 2 | Actb, Eif2s1       |

|   |            |                                                                                          |                    |   |                   |
|---|------------|------------------------------------------------------------------------------------------|--------------------|---|-------------------|
| 6 | GO:0017148 | Negative regulation of translation                                                       | Biological process | 2 | Eif2s1, Rps3      |
| 6 | GO:0006401 | RNA catabolic process                                                                    | Biological process | 2 | Vim, Dkc1         |
| 6 | GO:0050863 | Regulation of T cell activation                                                          | Biological process | 2 | Rps3, Nkap        |
| 6 | GO:0050870 | Positive regulation of T cell activation                                                 | Biological process | 2 | Rps3, Nkap        |
| 6 | GO:1905475 | Regulation of protein localization to membrane                                           | Biological process | 2 | Sptbn1, Rab11a    |
| 6 | GO:0014074 | Response to purine-containing compound                                                   | Biological process | 2 | Hsp90b1, Rplp0    |
| 6 | GO:0070670 | Response to interleukin-4                                                                | Biological process | 2 | Tuba1b, Rplp0     |
| 6 | GO:0032091 | Negative regulation of protein binding                                                   | Biological process | 2 | Eif2s1, Actb      |
| 6 | GO:0010921 | Regulation of phosphatase activity                                                       | Biological process | 2 | Calm3, Hsp90b1    |
| 6 | GO:0030490 | Maturation of SSU-rRNA                                                                   | Biological process | 2 | Rps14, Rps19      |
| 7 | GO:0016071 | mRNA metabolic process                                                                   | Biological process | 2 | Vim, Dkc1         |
| 7 | GO:0032482 | Rab protein signal transduction                                                          | Biological process | 2 | Rab1a, Rab11a     |
| 7 | GO:0010975 | Regulation of neuron projection development                                              | Biological process | 2 | Vim, Rab11a       |
| 7 | GO:0071353 | Cellular response to interleukin-4                                                       | Biological process | 2 | Tuba1b, Rplp0     |
| 7 | GO:0043666 | Regulation of phosphoprotein phosphatase activity                                        | Biological process | 2 | Calm3, Hsp90b1    |
| 7 | GO:0000462 | Maturation of SSU-rRNA from tricistronic rRNA transcript (SSU-rRNA, 5.8S rRNA, LSU-rRNA) | Biological process | 2 | Rps14, Rps19      |
| 2 | GO:0043473 | Pigmentation                                                                             | Biological process | 2 | Rab1a, Rab11a     |
| 3 | GO:0007059 | Chromosome segregation                                                                   | Biological process | 2 | Rab11a, Rps3      |
| 3 | GO:0033059 | Cellular pigmentation                                                                    | Biological process | 2 | Rab1a, Rab11a     |
| 3 | GO:0044706 | Multi-multicellular organism process                                                     | Biological process | 2 | Tmed2, Vim        |
| 3 | GO:0090130 | Tissue migration                                                                         | Biological process | 2 | Pkn3, Rab11a      |
| 4 | GO:0006413 | Translational initiation                                                                 | Biological process | 2 | Eif2s1, Eif1ax    |
| 4 | GO:0006520 | Cellular amino acid metabolic process                                                    | Biological process | 2 | Yars, Sars1       |
| 4 | GO:0007051 | Spindle organization                                                                     | Biological process | 2 | Rab11a, Rps3      |
| 4 | GO:0090068 | Positive regulation of cell cycle process                                                | Biological process | 2 | Rab11a, Rpl17     |
| 4 | GO:0051875 | Pigment granule localization                                                             | Biological process | 2 | Rab1a, Rab11a     |
| 4 | GO:0051302 | Regulation of cell division                                                              | Biological process | 2 | Rab11a, Calm3     |
| 4 | GO:0001893 | Maternal placenta development                                                            | Biological process | 2 | Vim, Tmed2        |
| 4 | GO:0007565 | Female pregnancy                                                                         | Biological process | 2 | Tmed2, Vim        |
| 4 | GO:0060135 | Maternal process involved in female pregnancy                                            | Biological process | 2 | Tmed2, Vim        |
| 4 | GO:0001819 | Positive regulation of cytokine production                                               | Biological process | 2 | Rps3, Sptbn1      |
| 4 | GO:0032623 | Interleukin-2 production                                                                 | Biological process | 2 | Rps3, Sptbn1      |
| 4 | GO:1904377 | Positive regulation of protein localization to cell periphery                            | Biological process | 2 | Rab11a, Sptbn1    |
| 4 | GO:0051668 | Localization within membrane                                                             | Biological process | 2 | Rab1a, Rab11a     |
| 4 | GO:0001505 | Regulation of neurotransmitter levels                                                    | Biological process | 2 | HSP90AA1, Calm3   |
| 5 | GO:0043038 | Amino acid activation                                                                    | Biological process | 2 | Yars, Sars1       |
| 5 | GO:0007219 | Notch signaling pathway                                                                  | Biological process | 2 | Nkap, Rps19       |
| 5 | GO:0007346 | Regulation of mitotic cell cycle                                                         | Biological process | 2 | Rab11a, Rpl17     |
| 5 | GO:0045931 | Positive regulation of mitotic cell cycle                                                | Biological process | 2 | Rab11a, Rpl17     |
| 5 | GO:0006333 | Chromatin assembly or disassembly                                                        | Biological process | 2 | Hist1h2ail1, Pkn3 |
| 5 | GO:0034728 | Nucleosome organization                                                                  | Biological process | 2 | Hist1h2ail1, Pkn3 |
| 5 | GO:0007030 | Golgi organization                                                                       | Biological process | 2 | Rab1a, Tmed2      |
| 5 | GO:0031497 | Chromatin assembly                                                                       | Biological process | 2 | Hist1h2ail1, Pkn3 |
| 5 | GO:0032465 | Regulation of cytokinesis                                                                | Biological process | 2 | Rab11a, Calm3     |
| 5 | GO:0051225 | Spindle assembly                                                                         | Biological process | 2 | Rab11a, Rps3      |
| 5 | GO:1901987 | Regulation of cell cycle phase transition                                                | Biological process | 2 | Rab11a, Rpl17     |
| 5 | GO:0044839 | Cell cycle G2/M phase transition                                                         | Biological process | 2 | Calm3, Rab11a     |
| 5 | GO:1901989 | Positive regulation of cell cycle phase transition                                       | Biological process | 2 | Rab11a, Rpl17     |
| 5 | GO:0032400 | Melanosome localization                                                                  | Biological process | 2 | Rab1a, Rab11a     |
| 5 | GO:0051904 | Pigment granule transport                                                                | Biological process | 2 | Rab1a, Rab11a     |
| 5 | GO:0051905 | Establishment of pigment granule localization                                            | Biological process | 2 | Rab1a, Rab11a     |
| 5 | GO:0071241 | Cellular response to inorganic substance                                                 | Biological process | 2 | Hsp90b1, Eif2s1   |
| 5 | GO:0032663 | Regulation of interleukin-2 production                                                   | Biological process | 2 | Rps3, Sptbn1      |
| 5 | GO:0032743 | Positive regulation of interleukin-2 production                                          | Biological process | 2 | Sptbn1, Rps3      |
| 5 | GO:1903078 | Positive regulation of protein localization to plasma membrane                           | Biological process | 2 | Rab11a, Sptbn1    |
| 5 | GO:0046683 | Response to organophosphorus                                                             | Biological process | 2 | Hsp90b1, Rplp0    |
| 5 | GO:0010269 | Response to selenium ion                                                                 | Biological process | 2 | Vim, Rplp0        |

|   |            |                                                            |                    |   |                   |
|---|------------|------------------------------------------------------------|--------------------|---|-------------------|
| 6 | GO:0043039 | Trna aminoacylation                                        | Biological process | 2 | Yars, Sars1       |
| 6 | GO:1901990 | Regulation of mitotic cell cycle phase transition          | Biological process | 2 | Rab11a, Rpl17     |
| 6 | GO:1901992 | Positive regulation of mitotic cell cycle phase transition | Biological process | 2 | Rab11a, Rpl17     |
| 6 | GO:0006334 | Nucleosome assembly                                        | Biological process | 2 | Hist1h2ail1, Pkn3 |
| 6 | GO:0071103 | DNA conformation change                                    | Biological process | 2 | Hist1h2ail1, Pkn3 |
| 6 | GO:0000086 | G2/M transition of mitotic cell cycle                      | Biological process | 2 | Rab11a, Calm3     |
| 6 | GO:0032401 | Establishment of melanosome localization                   | Biological process | 2 | Rab1a, Rab11a     |
| 6 | GO:0032402 | Melanosome transport                                       | Biological process | 2 | Rab1a, Rab11a     |
| 6 | GO:0071248 | Cellular response to metal ion                             | Biological process | 2 | Hsp90b1, Eif2s1   |
| 6 | GO:1904375 | Regulation of protein localization to cell periphery       | Biological process | 2 | Sptbn1, Rab11a    |
| 6 | GO:0009411 | Response to UV                                             | Biological process | 2 | Eif2s1, Rpl35     |
| 6 | GO:0071482 | Cellular response to light stimulus                        | Biological process | 2 | Eif2s1, Rpl35     |
| 6 | GO:0010042 | Response to manganese ion                                  | Biological process | 2 | Hsp90b1, Eif2s1   |
| 6 | GO:0098876 | Vesicle-mediated transport to the plasma membrane          | Biological process | 2 | Sptbn1, Rab11a    |
| 6 | GO:0061951 | Establishment of protein localization to plasma membrane   | Biological process | 2 | Sptbn1, Rab11a    |
| 7 | GO:0006418 | tRNA aminoacylation for protein translation                | Biological process | 2 | Sars1, Yars       |
| 7 | GO:0006323 | DNA packaging                                              | Biological process | 2 | Hist1h2ail1, Pkn3 |
| 7 | GO:0051291 | Protein heterooligomerization                              | Biological process | 2 | Hist1h2ail1       |
| 7 | GO:0050770 | Regulation of axonogenesis                                 | Biological process | 2 | Rab11a, Vim       |
| 7 | GO:0071287 | Cellular response to manganese ion                         | Biological process | 2 | Eif2s1, Hsp90b1   |
| 7 | GO:1903076 | Regulation of protein localization to plasma membrane      | Biological process | 2 | Rab11a, Sptbn1    |
| 7 | GO:0034644 | Cellular response to UV                                    | Biological process | 2 | Rpl35, Eif2s1     |
| 8 | GO:0046777 | Protein autophosphorylation                                | Biological process | 2 | Hspa9, Eif2s1     |
| 8 | GO:0006399 | tRNA metabolic process                                     | Biological process | 2 | Yars, Sars1       |
| 5 | GO:0060249 | Anatomical structure homeostasis                           | Biological process | 2 | Col2a1, Dkc1      |
| 5 | GO:0043069 | Negative regulation of programmed cell death               | Biological process | 2 | Hsp90b1, Col2a1   |
| 5 | GO:0048878 | Chemical homeostasis                                       | Biological process | 2 | Calm3, Myoc       |
| 6 | GO:0043066 | Negative regulation of apoptotic process                   | Biological process | 2 | Col2a1, Hsp90b1   |
| 7 | GO:0042325 | Regulation of phosphorylation                              | Biological process | 2 | Myoc, Rps3        |
| 3 | GO:0002252 | Immune effector process                                    | Biological process | 2 | Htra1, Rps19      |
| 3 | GO:0042330 | Taxis                                                      | Biological process | 2 | Rps19, B3gnt2     |
| 4 | GO:0006935 | Chemotaxis                                                 | Biological process | 2 | Rps19, B3gnt2     |
| 4 | GO:0032101 | Regulation of response to external stimulus                | Biological process | 2 | Htra1, Rps19      |
| 4 | GO:0010817 | Regulation of hormone levels                               | Biological process | 2 | Cpd, Rab1a        |
| 5 | GO:0009792 | Embryo development ending in birth or egg hatching         | Biological process | 2 | Tmed2, Col2a1     |
| 6 | GO:0043009 | Chordate embryonic development                             | Biological process | 2 | Tmed2, Col2a1     |
| 7 | GO:0001932 | Regulation of protein phosphorylation                      | Biological process | 2 | Myoc, Rps3        |
| 3 | GO:0040008 | Regulation of growth                                       | Biological process | 2 | Htra1, Rab11a     |
| 3 | GO:0040017 | Positive regulation of locomotion                          | Biological process | 2 | Rab11a, Myoc      |
| 4 | GO:0002697 | Regulation of immune effector process                      | Biological process | 2 | Htra1, Rps19      |
| 4 | GO:0023014 | Signal transduction by protein phosphorylation             | Biological process | 2 | Myoc, Rps3        |
| 4 | GO:0097190 | Apoptotic signaling pathway                                | Biological process | 2 | Rps3, Col2a1      |
| 4 | GO:0051272 | Positive regulation of cellular component movement         | Biological process | 2 | Rab11a, Myoc      |
| 4 | GO:0032970 | Regulation of actin filament-based process                 | Biological process | 2 | Myoc, Sptbn1      |
| 4 | GO:0003012 | Muscle system process                                      | Biological process | 2 | Myoc, Calm3       |
| 4 | GO:2000147 | Positive regulation of cell motility                       | Biological process | 2 | Rab11a, Myoc      |
| 4 | GO:0001101 | Response to acid chemical                                  | Biological process | 2 | Hspa9, Col2a1     |
| 5 | GO:0000165 | MAPK cascade                                               | Biological process | 2 | Myoc, Rps3        |
| 5 | GO:2001233 | Regulation of apoptotic signaling pathway                  | Biological process | 2 | Rps3, Col2a1      |
| 5 | GO:1902905 | Positive regulation of supramolecular fiber organization   | Biological process | 2 | Rps3, Myoc        |
| 5 | GO:0032956 | Regulation of actin cytoskeleton organization              | Biological process | 2 | Myoc, Sptbn1      |
| 5 | GO:0007507 | Heart development                                          | Biological process | 2 | Tmed2, Col2a1     |
| 5 | GO:0030335 | Positive regulation of cell migration                      | Biological process | 2 | Rab11a, Myoc      |
| 5 | GO:0031347 | Regulation of defense response                             | Biological process | 2 | Htra1, Rps19      |
| 6 | GO:0051495 | Positive regulation of cytoskeleton organization           | Biological process | 2 | Rps3, Myoc        |
| 6 | GO:0110053 | Regulation of actin filament organization                  | Biological process | 2 | Myoc, Sptbn1      |
| 6 | GO:0071396 | Cellular response to lipid                                 | Biological process | 2 | Col2a1, Rplp0     |
| 6 | GO:0050801 | Ion homeostasis                                            | Biological process | 2 | Calm3, Myoc       |

|                           |            |                                                                                                 |                    |    |                                                                                                                                                                                                  |
|---------------------------|------------|-------------------------------------------------------------------------------------------------|--------------------|----|--------------------------------------------------------------------------------------------------------------------------------------------------------------------------------------------------|
| 3                         | GO:0016049 | Cell growth                                                                                     | Biological process | 2  | Htra1, Rab11a                                                                                                                                                                                    |
| 3                         | GO:0007389 | Pattern specification process                                                                   | Biological process | 2  | Tmed2, Chrd                                                                                                                                                                                      |
| 4                         | GO:0002698 | Negative regulation of immune effector process                                                  | Biological process | 2  | Htra1, Rps19                                                                                                                                                                                     |
| 4                         | GO:0031589 | Cell-substrate adhesion                                                                         | Biological process | 2  | Myoc, Rab1a                                                                                                                                                                                      |
| 4                         | GO:0003002 | Regionalization                                                                                 | Biological process | 2  | Tmed2, Chrd                                                                                                                                                                                      |
| 4                         | GO:0048729 | Tissue morphogenesis                                                                            | Biological process | 2  | Chrd, Tmed2                                                                                                                                                                                      |
| 4                         | GO:0001525 | Angiogenesis                                                                                    | Biological process | 2  | Sars1, Tgfbi                                                                                                                                                                                     |
| 4                         | GO:0032102 | Negative regulation of response to external stimulus                                            | Biological process | 2  | Htra1, Rps19                                                                                                                                                                                     |
| 4                         | GO:0009612 | Response to mechanical stimulus                                                                 | Biological process | 2  | Col2a1, Actb                                                                                                                                                                                     |
| 4                         | GO:1990089 | Response to nerve growth factor                                                                 | Biological process | 2  | Rps3, Myoc                                                                                                                                                                                       |
| 5                         | GO:0051017 | Actin filament bundle assembly                                                                  | Biological process | 2  | Hsp90b1, Myoc                                                                                                                                                                                    |
| 5                         | GO:0031670 | Cellular response to nutrient                                                                   | Biological process | 2  | Col2a1, Hsp90b1                                                                                                                                                                                  |
| 5                         | GO:0048568 | Embryonic organ development                                                                     | Biological process | 2  | Tmed2, Col2a1                                                                                                                                                                                    |
| 5                         | GO:0003007 | Heart morphogenesis                                                                             | Biological process | 2  | Tmed2, Col2a1                                                                                                                                                                                    |
| 5                         | GO:0048562 | Embryonic organ morphogenesis                                                                   | Biological process | 2  | Tmed2, Col2a1                                                                                                                                                                                    |
| 5                         | GO:0048514 | Blood vessel morphogenesis                                                                      | Biological process | 2  | Tgfbi, Sars1                                                                                                                                                                                     |
| 5                         | GO:1990090 | Cellular response to nerve growth factor stimulus                                               | Biological process | 2  | Rps3, Myoc                                                                                                                                                                                       |
| 6                         | GO:0043408 | Regulation of MAPK cascade                                                                      | Biological process | 2  | Rps3, Myoc                                                                                                                                                                                       |
| 6                         | GO:0061572 | Actin filament bundle organization                                                              | Biological process | 2  | Hsp90b1, Myoc                                                                                                                                                                                    |
| 4                         | GO:0001558 | Regulation of cell growth                                                                       | Biological process | 2  | Rab11a, Htra1                                                                                                                                                                                    |
| 4                         | GO:0031348 | Negative regulation of defense response                                                         | Biological process | 2  | Htra1, Rps19                                                                                                                                                                                     |
| 4                         | GO:0071774 | Response to fibroblast growth factor                                                            | Biological process | 2  | Vim, Col2a1                                                                                                                                                                                      |
| 5                         | GO:1902532 | Negative regulation of intracellular signal transduction                                        | Biological process | 2  | Myoc, Calm3                                                                                                                                                                                      |
| 5                         | GO:0010639 | Negative regulation of organelle organization                                                   | Biological process | 2  | Myoc, Sptbn1                                                                                                                                                                                     |
| 5                         | GO:1902904 | Negative regulation of supramolecular fiber organization                                        | Biological process | 2  | Myoc, Sptbn1                                                                                                                                                                                     |
| 5                         | GO:0010770 | Positive regulation of cell morphogenesis involved in differentiation                           | Biological process | 2  | Rab11a, Myoc                                                                                                                                                                                     |
| 5                         | GO:0034446 | Substrate adhesion-dependent cell spreading                                                     | Biological process | 2  | Myoc, Rab1a                                                                                                                                                                                      |
| 6                         | GO:0051494 | Negative regulation of cytoskeleton organization                                                | Biological process | 2  | Myoc, Sptbn1                                                                                                                                                                                     |
| 6                         | GO:0034612 | Response to tumor necrosis factor                                                               | Biological process | 2  | Rps3, Col2a1                                                                                                                                                                                     |
| 7                         | GO:0071356 | Cellular response to tumor necrosis factor                                                      | Biological process | 2  | Rps3, Col2a1                                                                                                                                                                                     |
| 4                         | GO:0060322 | Head development                                                                                | Biological process | 2  | Chrd, Col2a1                                                                                                                                                                                     |
| 4                         | GO:0090287 | Regulation of cellular response to growth factor stimulus                                       | Biological process | 2  | Htra1, Chrd                                                                                                                                                                                      |
| 4                         | GO:0050877 | Nervous system process                                                                          | Biological process | 2  | Col2a1, B3gnt2                                                                                                                                                                                   |
| 5                         | GO:0090092 | Regulation of transmembrane receptor protein serine/threonine kinase signaling pathway          | Biological process | 2  | Htra1, Chrd                                                                                                                                                                                      |
| 6                         | GO:0007169 | Transmembrane receptor protein tyrosine kinase signaling pathway                                | Biological process | 2  | Myoc, Angptl1                                                                                                                                                                                    |
| 4                         | GO:0043062 | Extracellular structure organization                                                            | Biological process | 2  | Tgfbi, Col2a1                                                                                                                                                                                    |
| 4                         | GO:0090288 | Negative regulation of cellular response to growth factor                                       | Biological process | 2  | Htra1, Chrd                                                                                                                                                                                      |
| 5                         | GO:0090101 | Negative regulation of transmembrane receptor protein serine/threonine kinase signaling pathway | Biological process | 2  | Htra1, Chrd                                                                                                                                                                                      |
| 5                         | GO:0030514 | Negative regulation of BMP signaling pathway                                                    | Biological process | 2  | Htra1, Chrd                                                                                                                                                                                      |
| 5                         | GO:0030510 | Regulation of BMP signaling pathway                                                             | Biological process | 2  | Htra1, Chrd                                                                                                                                                                                      |
| 5                         | GO:0007600 | Sensory perception                                                                              | Biological process | 2  | Col2a1, B3gnt2                                                                                                                                                                                   |
| 6                         | GO:0030509 | BMP signaling pathway                                                                           | Biological process | 2  | Chrd, Htra1                                                                                                                                                                                      |
| 4                         | GO:0001649 | Osteoblast differentiation                                                                      | Biological process | 2  | Chrd, Myoc                                                                                                                                                                                       |
| 5                         | GO:0030198 | Extracellular matrix organization                                                               | Biological process | 2  | Col2a1, Tgfbi                                                                                                                                                                                    |
| 5                         | GO:0002062 | Chondrocyte differentiation                                                                     | Biological process | 2  | Tgfbi, Col2a1                                                                                                                                                                                    |
| 5                         | GO:0061448 | Connective tissue development                                                                   | Biological process | 2  | Col2a1, Tgfbi                                                                                                                                                                                    |
| 5                         | GO:0051216 | Cartilage development                                                                           | Biological process | 2  | Col2a1, Tgfbi                                                                                                                                                                                    |
| 5                         | GO:0060348 | Bone development                                                                                | Biological process | 2  | Col2a1, Myoc                                                                                                                                                                                     |
| <b>Molecular Function</b> |            |                                                                                                 |                    |    |                                                                                                                                                                                                  |
| 3                         | GO:0005515 | Protein binding                                                                                 | Molecular Function | 31 | Hspa9,Hsp90b1,Rps3,Sumo2,Hdgf,Myoc,Ubc,,Sptbn1,Angptl1,Tgfbi,Htra1,Rab11a ,Vim,Calm3,Actb,Psmc6,Col2a1,Rps19,HSP90AA1,Tuba1b,Rlc-a,Sars1,Rab1a,Hist1h2ail1,Rpl34,Chrd,Cpd,Tmed2,Rps5,Eif2s1,Dkc1 |

|   |            |                                                                                    |                    |    |                                                                                                                                                                                                                                                                                                            |
|---|------------|------------------------------------------------------------------------------------|--------------------|----|------------------------------------------------------------------------------------------------------------------------------------------------------------------------------------------------------------------------------------------------------------------------------------------------------------|
| 3 | GO:0097159 | Organic cyclic compound binding                                                    | Molecular Function | 27 | Yars,Hdgf,Rps3,Sars1,Rps14,Hsp90b1,Rpl27a,Rpl34,Rps4x,Rps5,Taf15,Dkc1,Tuba1b,Vim,Rpl35,Eif1ax,Eif2s1,Actb,Hspa9,Pkn3,Uba1,Psmc6,Rab1a,Rab11a,Nkap,Hist1h2ail1,Rpl17                                                                                                                                        |
| 3 | GO:1901363 | Heterocyclic compound binding                                                      | Molecular Function | 27 | Yars,Hdgf,Rps3,Sars1,Rps14,Hsp90b1,Rpl27a,Rpl34,Rps4x,Rps5,Taf15,Dkc1,Tuba1b,Vim,Rpl35,Eif1ax,Eif2s1,Actb,Hspa9,Pkn3,Uba1,Psmc6,Rab1a,Rab11a,Nkap,Hist1h2ail1,Rpl17                                                                                                                                        |
| 1 | GO:0003674 | Molecular_function                                                                 | Molecular Function | 21 | Hspa9,Hsp90b1,Yars,Hdgf,Actb,HSP90AA1,Vim,Rps19,Rps3,Calm3,Rpl34,Sumo2,Tmed2,Rps5,Eif2s1,Dkc1,Tuba1b,Rab1a,Rab11a,Sars1,Rlc-a,Myoc,Ubc,Nkap,Taf15,Rps14,Rpl27a,Rps4x,,Rpl35,Rpl17,Rplp0,LOC100360647,Rps25,Rps12,Eif1ax,Sptbn1,Htra1,Cpd,Angptl1,Tgfb1,Pkn3,Uba1,Col2a1,Psmc6,Chrd,B3gnt2,Psm6,Hist1h2ail1 |
| 3 | GO:0043167 | Ion binding                                                                        | Molecular Function | 20 | Calm3,Rlc-a,Myoc,Col2a1,Taf15,Actb,Hsp90b1,Hspa9,Pkn3,Uba1,Psmc6,Yars,Sars1,Tuba1b,Rab1a,Rab11a,Sptbn1,Hdgf,Chrd,Cpd                                                                                                                                                                                       |
| 4 | GO:0003676 | Nucleic acid binding                                                               | Molecular Function | 20 | Yars,Rps3,Hdgf,Sars1,Rps14,Hsp90b1,Rpl27a,Rpl34,Rps4x,Rps5,Taf15,Dkc1,Tuba1b,Vim,Rpl35,Eif1ax,Eif2s1,Nkap,Hist1h2ail1,Rpl17                                                                                                                                                                                |
| 2 | GO:0005488 | Binding                                                                            | Molecular Function | 18 | Hspa9,Hsp90b1,Yars,Hdgf,Actb,HSP90AA1,Vim,Rps19,Rps3,Calm3,Rpl34,Sumo2,Tmed2,Rps5,Eif2s1,Dkc1,Sars1,Rlc-a,Myoc,Ubc,Nkap,Rps14,Rpl27a,Rps4x,Taf15,Tuba1b,,Rpl35,Eif1ax,Sptbn1,Angptl1,Tgfb1,Col2a1,Htra1,Pkn3,Uba1,Psmc6,Rab1a,Rab11a,Chrd,Cpd,Hist1h2ail1,Rplp0,Rpl17                                      |
| 2 | GO:0005198 | Structural molecule activity                                                       | Molecular Function | 18 | Rps14,Rps19,Rps3,Rpl17,Rpl27a,Rpl35,Rplp0,Rpl34,Rps4x,Rps5,LOC100360647,Rps25,Rps12,Tuba1b,Vim,Sptbn1,Col2a1,Actb                                                                                                                                                                                          |
| 2 | GO:0003824 | Catalytic activity                                                                 | Molecular Function | 16 | Tuba1b,Rab1a,Rab11a,Dkc1,Hspa9,Htra1,Rps3,Cpd,Pkn3,Sars1,Yars,Uba1,HSP90AA1,B3gnt2,Sumo2,Psmc6                                                                                                                                                                                                             |
| 5 | GO:0003723 | RNA binding                                                                        | Molecular Function | 16 | Yars,Tuba1b,Vim,Rps3,Rpl35,Rps5,Eif1ax,Eif2s1,Rps4x,Dkc1,Rps14,Rpl17,Hsp90b1,Rpl27a,Rpl34,Taf15                                                                                                                                                                                                            |
| 4 | GO:0043168 | Anion binding                                                                      | Molecular Function | 14 | Actb,Hsp90b1,Hspa9,Pkn3,Uba1,Psmc6,Yars,Sars1,Tuba1b,Rab1a,Rab11a,Sptbn1,Hdgf,Chrd                                                                                                                                                                                                                         |
| 4 | GO:0019899 | Enzyme binding                                                                     | Molecular Function | 13 | Ubc,Myoc,Calm3,Vim,Rps3,Actb,Rps19,Hsp90b1,Tuba1b,Sumo2,Hspa9,Sptbn1,Cpd                                                                                                                                                                                                                                   |
| 3 | GO:0097367 | Carbohydrate derivative binding                                                    | Molecular Function | 13 | Actb,Hsp90b1,Hspa9,Pkn3,Uba1,Psmc6,Yars,Sars1,Tuba1b,Rab1a,Rab11a,Hdgf,Chrd                                                                                                                                                                                                                                |
| 3 | GO:0003735 | Structural constituent of ribosome                                                 | Molecular Function | 13 | Rps14,Rps19,Rps3,Rpl17,Rpl27a,Rpl35,Rplp0,Rpl34,Rps4x,Rps5,LOC100360647,Rps25,Rps12                                                                                                                                                                                                                        |
| 3 | GO:0036094 | Small molecule binding                                                             | Molecular Function | 12 | Hdgf,Actb,Hsp90b1,Hspa9,Pkn3,Uba1,Psmc6,Yars,Sars1,Tuba1b,Rab1a,Rab11a                                                                                                                                                                                                                                     |
| 4 | GO:0000166 | Nucleotide binding                                                                 | Molecular Function | 12 | Actb,Hsp90b1,Hspa9,Pkn3,Uba1,Psmc6,Yars,Sars1,Tuba1b,Rab1a,Rab11a,Hdgf                                                                                                                                                                                                                                     |
| 4 | GO:1901265 | Nucleoside phosphate binding                                                       | Molecular Function | 12 | Hdgf,Actb,Hsp90b1,Hspa9,Pkn3,Uba1,Psmc6,Yars,Sars1,Tuba1b,Rab1a,Rab11a                                                                                                                                                                                                                                     |
| 4 | GO:0032553 | Ribonucleotide binding                                                             | Molecular Function | 11 | Actb,Hsp90b1,Hspa9,Pkn3,Uba1,Psmc6,Yars,Sars1,Tuba1b,Rab1a,Rab11a                                                                                                                                                                                                                                          |
| 4 | GO:0017076 | Purine nucleotide binding                                                          | Molecular Function | 11 | Actb,Hsp90b1,Hspa9,Pkn3,Uba1,Psmc6,Yars,Sars1,Tuba1b,Rab1a,Rab11a                                                                                                                                                                                                                                          |
| 5 | GO:0035639 | Purine ribonucleoside triphosphate binding                                         | Molecular Function | 11 | Actb,Hsp90b1,Hspa9,Pkn3,Uba1,Psmc6,Yars,Sars1,Tuba1b,Rab1a,Rab11a                                                                                                                                                                                                                                          |
| 5 | GO:0032555 | Purine ribonucleotide binding                                                      | Molecular Function | 11 | Actb,Hsp90b1,Hspa9,Pkn3,Uba1,Psmc6,Yars,Sars1,Tuba1b,Rab1a,Rab11a                                                                                                                                                                                                                                          |
| 3 | GO:0044877 | Protein-containing complex binding                                                 | Molecular Function | 10 | Tgfb1,Hist1h2ail1,Rpl35,Eif2s1,Ubc,Vim,Rps19,Rps3,Cpd,Sptbn1                                                                                                                                                                                                                                               |
| 3 | GO:0016787 | Hydrolase activity                                                                 | Molecular Function | 9  | Tuba1b,Rab1a,Rab11a,Hspa9,Htra1,Cpd,Rps3,HSP90AA1,Psmc6                                                                                                                                                                                                                                                    |
| 4 | GO:0005102 | Signaling receptor binding                                                         | Molecular Function | 8  | Myoc,Tgfb1,Hdgf,Rlc-a,Col2a1,Sumo2,Hsp90b1,Angptl1                                                                                                                                                                                                                                                         |
| 3 | GO:0008144 | Drug binding                                                                       | Molecular Function | 8  | Actb,Hsp90b1,Hspa9,Pkn3,Uba1,Psmc6,Yars,Sars1                                                                                                                                                                                                                                                              |
| 4 | GO:0005524 | ATP binding                                                                        | Molecular Function | 8  | Actb,Hsp90b1,Hspa9,Pkn3,Uba1,Psmc6,Yars,Sars1                                                                                                                                                                                                                                                              |
| 6 | GO:0030554 | Adenyl nucleotide binding                                                          | Molecular Function | 8  | Actb,Hsp90b1,Hspa9,Pkn3,Uba1,Psmc6,Yars,Sars1                                                                                                                                                                                                                                                              |
| 6 | GO:0032559 | Adenyl ribonucleotide binding                                                      | Molecular Function | 8  | Actb,Hsp90b1,Hspa9,Pkn3,Uba1,Psmc6,Yars,Sars1                                                                                                                                                                                                                                                              |
| 4 | GO:0042802 | Identical protein binding                                                          | Molecular Function | 7  | Rps19,Sars1,Actb,Vim,Htra1,Psmc6,Col2a1                                                                                                                                                                                                                                                                    |
| 4 | GO:0043169 | Cation binding                                                                     | Molecular Function | 6  | Calm3,Rlc-a,Myoc,Col2a1,Taf15,Cpd                                                                                                                                                                                                                                                                          |
| 5 | GO:0046872 | Metal ion binding                                                                  | Molecular Function | 6  | Calm3,Rlc-a,Cpd,Myoc,Col2a1,Taf15                                                                                                                                                                                                                                                                          |
| 4 | GO:0008092 | Cytoskeletal protein binding                                                       | Molecular Function | 6  | Sptbn1,Rps3,Rab11a,Actb,Calm3,Myoc                                                                                                                                                                                                                                                                         |
| 5 | GO:0019900 | Kinase binding                                                                     | Molecular Function | 6  | Myoc,Actb,,Vim,Rps19,Rps3,Calm3                                                                                                                                                                                                                                                                            |
| 6 | GO:0019901 | Protein kinase binding                                                             | Molecular Function | 6  | Myoc,Actb,,Vim,Rps19,Rps3,Calm3                                                                                                                                                                                                                                                                            |
| 4 | GO:0016817 | Hydrolase activity, acting on acid anhydrides                                      | Molecular Function | 6  | Tuba1b,Rab1a,Rab11a,Hspa9,HSP90AA1,Psmc6                                                                                                                                                                                                                                                                   |
| 5 | GO:0016818 | Hydrolase activity, acting on acid anhydrides, in phosphorus-containing anhydrides | Molecular Function | 6  | Tuba1b,Rab1a,Rab11a,Hspa9,HSP90AA1,Psmc6                                                                                                                                                                                                                                                                   |



|   |            |                                                                 |                    |   |                                          |
|---|------------|-----------------------------------------------------------------|--------------------|---|------------------------------------------|
| 6 | GO:0016462 | Pyrophosphatase activity                                        | Molecular Function | 6 | Tuba1b,Rab1a,Rab11a,Hspa9,HSP90AA1,Psmc6 |
| 7 | GO:0017111 | Nucleoside-triphosphatase activity                              | Molecular Function | 6 | Tuba1b,Rab1a,Rab11a,Hspa9,HSP90AA1,Psmc6 |
| 4 | GO:0050839 | Cell adhesion molecule binding                                  | Molecular Function | 5 | Tgfb1,Rab1a,Hist1h2ail1,Rpl34,Sptbn1     |
| 4 | GO:0008134 | Transcription factor binding                                    | Molecular Function | 5 | Sumo2,Hdgf,Psmc6,Actb,Rps3               |
| 5 | GO:0003677 | DNA binding                                                     | Molecular Function | 5 | Rps3,Hdgf,Sars1,Nkap,Hist1h2ail1,        |
| 6 | GO:0019843 | rRNA binding                                                    | Molecular Function | 5 | Rpl17,Rps14,Rps3,Rps4x,Rps5              |
| 3 | GO:0140096 | Catalytic activity, acting on a protein                         | Molecular Function | 4 | Htra1,Cpd,Pkn3,Sumo2                     |
| 4 | GO:0019838 | Growth factor binding                                           | Molecular Function | 4 | Htra1,Rps19,Hspa9,Col2a1                 |
| 3 | GO:0016740 | Transferase activity                                            | Molecular Function | 4 | Dkc1,Pkn3,B3gnt2,Sumo2                   |
| 2 | GO:0098772 | Molecular function regulator                                    | Molecular Function | 4 | Hdgf,Calm3,Psmc6,HSP90AA1                |
| 3 | GO:0005200 | Structural constituent of cytoskeleton                          | Molecular Function | 4 | Actb,Tuba1b,Vim,Sptbn1                   |
| 4 | GO:0019904 | Protein domain specific binding                                 | Molecular Function | 4 | HSP90AA1,Calm3,Vim,Rab11a                |
| 5 | GO:0045296 | Cadherin binding                                                | Molecular Function | 4 | Rab1a,Hist1h2ail1,Rpl34,Sptbn1           |
| 5 | GO:0044389 | Ubiquitin-like protein ligase binding                           | Molecular Function | 4 | Ubc,Tuba1b,Sumo2,Hspa9                   |
| 6 | GO:0003729 | mRNA binding                                                    | Molecular Function | 4 | Rps14,Rps3,Rpl35,Rps5                    |
| 6 | GO:0031625 | Ubiquitin protein ligase binding                                | Molecular Function | 4 | Ubc,Tuba1b,Sumo2,Hspa9                   |
| 5 | GO:0019902 | Phosphatase binding                                             | Molecular Function | 3 | Hsp90b1,Vim,Cpd                          |
| 6 | GO:0019903 | Protein phosphatase binding                                     | Molecular Function | 3 | Vim,Cpd,Hsp90b1                          |
| 3 | GO:0030234 | Enzyme regulator activity                                       | Molecular Function | 3 | HSP90AA1,Calm3,Psmc6                     |
| 3 | GO:0016874 | Ligase activity                                                 | Molecular Function | 3 | Sars1,Yars,Uba1                          |
| 4 | GO:0046983 | Protein dimerization activity                                   | Molecular Function | 3 | Rps19,Sars1,Hist1h2ail1                  |
| 4 | GO:0001882 | Nucleoside binding                                              | Molecular Function | 3 | Tuba1b,Rab1a,Rab11a                      |
| 5 | GO:0001883 | Purine nucleoside binding                                       | Molecular Function | 3 | Tuba1b,Rab1a,Rab11a                      |
| 5 | GO:0032549 | Ribonucleoside binding                                          | Molecular Function | 3 | Tuba1b,Rab1a,Rab11a                      |
| 5 | GO:0001067 | Regulatory region nucleic acid binding                          | Molecular Function | 3 | Rps3,Hdgf,Sars1                          |
| 6 | GO:0019001 | Guanyl nucleotide binding                                       | Molecular Function | 3 | Tuba1b,Rab1a,Rab11a                      |
| 6 | GO:0032550 | Purine ribonucleoside binding                                   | Molecular Function | 3 | Tuba1b,Rab1a,Rab11a                      |
| 6 | GO:0005525 | GTP binding                                                     | Molecular Function | 3 | Tuba1b,Rab1a,Rab11a                      |
| 6 | GO:0032561 | Guanyl ribonucleotide binding                                   | Molecular Function | 3 | Tuba1b,Rab1a,Rab11a                      |
| 6 | GO:0044212 | Transcription regulatory region DNA binding                     | Molecular Function | 3 | Rps3,Hdgf,Sars1                          |
| 6 | GO:0003690 | Double-stranded DNA binding                                     | Molecular Function | 3 | Rps3,Hdgf,Sars1                          |
| 6 | GO:0043565 | Sequence-specific DNA binding                                   | Molecular Function | 3 | Rps3,Hdgf,Sars1                          |
| 7 | GO:0000976 | Transcription regulatory region sequence-specific DNA binding   | Molecular Function | 3 | Rps3,Hdgf,Sars1                          |
| 7 | GO:1990837 | Sequence-specific double-stranded DNA binding                   | Molecular Function | 3 | Rps3,Hdgf,Sars1                          |
| 8 | GO:0016887 | ATPase activity                                                 | Molecular Function | 3 | Hspa9,Psmc6,HSP90AA1                     |
| 8 | GO:0003924 | GTPase activity                                                 | Molecular Function | 3 | Tuba1b,Rab1a,Rab11a                      |
| 4 | GO:0008233 | Peptidase activity                                              | Molecular Function | 2 | Htra1,Cpd                                |
| 4 | GO:0017171 | Serine hydrolase activity                                       | Molecular Function | 2 | Htra1,Cpd                                |
| 5 | GO:0070011 | Peptidase activity, acting on L-amino acid peptides             | Molecular Function | 2 | Htra1,Cpd,                               |
| 5 | GO:0008236 | Serine-type peptidase activity                                  | Molecular Function | 2 | Htra1,Cpd,                               |
| 3 | GO:1901681 | Sulfur compound binding                                         | Molecular Function | 2 | Hdgf,Chrd,                               |
| 4 | GO:0005539 | Glycosaminoglycan binding                                       | Molecular Function | 2 | Hdgf,Chrd,                               |
| 4 | GO:0008201 | Heparin binding                                                 | Molecular Function | 2 | Hdgf,Chrd,                               |
| 5 | GO:0017022 | Myosin binding                                                  | Molecular Function | 2 | Rab11a,Myoc                              |
| 7 | GO:0051721 | Protein phosphatase 2A binding                                  | Molecular Function | 2 | Vim,Cpd                                  |
| 2 | GO:0140110 | Transcription regulator activity                                | Molecular Function | 2 | Hdgf,Taf15                               |
| 2 | GO:0031386 | Protein tag                                                     | Molecular Function | 2 | Ubc,Sumo2                                |
| 3 | GO:0140097 | Catalytic activity, acting on DNA                               | Molecular Function | 2 | Dkc1,Rps3                                |
| 3 | GO:0140098 | Catalytic activity, acting on RNA                               | Molecular Function | 2 | Sars1,Yars                               |
| 3 | GO:0003682 | Chromatin binding                                               | Molecular Function | 2 | Nkap,Hist1h2ail1                         |
| 4 | GO:0051082 | Unfolded protein binding                                        | Molecular Function | 2 | Hsp90b1,Hspa9                            |
| 4 | GO:0016772 | Transferase activity, transferring phosphorus-containing groups | Molecular Function | 2 | Dkc1,Pkn3                                |
| 4 | GO:0031072 | Heat shock protein binding                                      | Molecular Function | 2 | Rps3,Hspa9                               |
| 4 | GO:0043021 | Ribonucleoprotein complex binding                               | Molecular Function | 2 | Eif2s1,Rpl35                             |
| 4 | GO:0016875 | Ligase activity, forming carbon-oxygen bonds                    | Molecular Function | 2 | Sars1,Yars                               |
| 4 | GO:0140101 | Catalytic activity, acting on a tRNA                            | Molecular Function | 2 | Sars1,Yars                               |
| 4 | GO:0031490 | Chromatin DNA binding                                           | Molecular Function | 2 | Hist1h2ail1,Nkap                         |
| 4 | GO:0030235 | Nitric-oxide synthase regulator activity                        | Molecular Function | 2 | HSP90AA1,Calm3                           |

|                           |            |                                                                   |                    |    |                                                                                                                                                                                                                                                                                                                                                                                                                                                                                                                                                                                                                                                  |
|---------------------------|------------|-------------------------------------------------------------------|--------------------|----|--------------------------------------------------------------------------------------------------------------------------------------------------------------------------------------------------------------------------------------------------------------------------------------------------------------------------------------------------------------------------------------------------------------------------------------------------------------------------------------------------------------------------------------------------------------------------------------------------------------------------------------------------|
| 5                         | GO:0042803 | Protein homodimerization activity                                 | Molecular Function | 2  | Rps19,Sars1                                                                                                                                                                                                                                                                                                                                                                                                                                                                                                                                                                                                                                      |
| 5                         | GO:0015631 | Tubulin binding                                                   | Molecular Function | 2  | Rps3,Rab11a                                                                                                                                                                                                                                                                                                                                                                                                                                                                                                                                                                                                                                      |
| 5                         | GO:0004812 | Aminoacyl-tRNA ligase activity                                    | Molecular Function | 2  | Sars1,Yars                                                                                                                                                                                                                                                                                                                                                                                                                                                                                                                                                                                                                                       |
| 5                         | GO:0001221 | Transcription cofactor binding                                    | Molecular Function | 2  | Sumo2,Hdgf                                                                                                                                                                                                                                                                                                                                                                                                                                                                                                                                                                                                                                       |
| 5                         | GO:0017134 | Fibroblast growth factor binding                                  | Molecular Function | 2  | Rps19,Hspa9                                                                                                                                                                                                                                                                                                                                                                                                                                                                                                                                                                                                                                      |
| 5                         | GO:0050998 | Nitric-oxide synthase binding                                     | Molecular Function | 2  | Actb,Calm3                                                                                                                                                                                                                                                                                                                                                                                                                                                                                                                                                                                                                                       |
| 6                         | GO:0003725 | Double-stranded RNA binding                                       | Molecular Function | 2  | Tuba1b,Vim                                                                                                                                                                                                                                                                                                                                                                                                                                                                                                                                                                                                                                       |
| 6                         | GO:0008017 | Microtubule binding                                               | Molecular Function | 2  | Rps3,Rab11a                                                                                                                                                                                                                                                                                                                                                                                                                                                                                                                                                                                                                                      |
| 6                         | GO:0005509 | Calcium ion binding                                               | Molecular Function | 2  | Calm3,Rlc-a                                                                                                                                                                                                                                                                                                                                                                                                                                                                                                                                                                                                                                      |
| 6                         | GO:0008135 | Translation factor activity, RNA binding                          | Molecular Function | 2  | Eif1ax,Eif2s1                                                                                                                                                                                                                                                                                                                                                                                                                                                                                                                                                                                                                                    |
| 6                         | GO:0001222 | Transcription corepressor binding                                 | Molecular Function | 2  | Sumo2,Hdgf                                                                                                                                                                                                                                                                                                                                                                                                                                                                                                                                                                                                                                       |
| 7                         | GO:0001012 | RNA polymerase II regulatory region DNA binding                   | Molecular Function | 2  | Rps3,Hdgf                                                                                                                                                                                                                                                                                                                                                                                                                                                                                                                                                                                                                                        |
| 7                         | GO:0003743 | Translation initiation factor activity                            | Molecular Function | 2  | Eif1ax,Eif2s1                                                                                                                                                                                                                                                                                                                                                                                                                                                                                                                                                                                                                                    |
| 7                         | GO:0070181 | Small ribosomal subunit rRNA binding                              | Molecular Function | 2  | Rps14,Rps3                                                                                                                                                                                                                                                                                                                                                                                                                                                                                                                                                                                                                                       |
| 8                         | GO:0000977 | RNA polymerase II regulatory region sequence-specific DNA binding | Molecular Function | 2  | Hdgf,Rps3                                                                                                                                                                                                                                                                                                                                                                                                                                                                                                                                                                                                                                        |
| 9                         | GO:0042623 | ATPase activity, coupled                                          | Molecular Function | 2  | Psmc6,Hspa9                                                                                                                                                                                                                                                                                                                                                                                                                                                                                                                                                                                                                                      |
| <b>Cellular Component</b> |            |                                                                   |                    |    |                                                                                                                                                                                                                                                                                                                                                                                                                                                                                                                                                                                                                                                  |
| 1                         | GO:0005575 | Cellular_component                                                | Cellular Component | 47 | Rab11a, Rplp0, B3gnt2, Sptbn1, Tgfbi, Hdgf, Col2a1, Actb, Hsp90b1, Hist1h2ail1, Calm3, Rlc-a, Vim, Rps3, Htra1, Cpd, Rab1a, Tmed2, Hspa9, Psmc6, Eif2s1, Psmc6, Yars, Myoc, Angptl1, Chrd, Ubc, Tuba1b, HSP90AA1, Rps14, Rps19, Rpl34, Rps4x, Rps5, LOC100360647, Rps25, Rps12, Dkc1, Rpl17, Rpl27a, Uba1, Nkap, Sumo2, Pkn3, Taf15, Sars1, Rpl35                                                                                                                                                                                                                                                                                                |
| 2                         | GO:0005623 | Cell                                                              | Cellular Component | 45 | Actb, Vim, Rps3, Hsp90b1, Calm3, Htra1, Cpd, Sptbn1, Rab1a, B3gnt2, Rpl17, Rpl27a, Rpl35, Rplp0, Rpl34, Rps12, Rps14, Rps19, Rps4x, Rps5, Rps25, Hist1h2ail1, Psmc6, Psmc6, Uba1, Rab11a, Dkc1, Rlc-a, Hspa9, Nkap, Yars, Sars1, LOC100360647, Eif2s1, Ubc, HSP90AA1, Sumo2, Hdgf, Pkn3, Taf15, Tuba1b, Myoc, Col2a1, Tmed2, Tgfbi                                                                                                                                                                                                                                                                                                               |
| 2                         | GO:0044464 | Cell part                                                         | Cellular Component | 45 | Actb, Vim, Rps3, Hsp90b1, Calm3, Htra1, Cpd, Sptbn1, Rab1a, Rab11a, Myoc, Ubc, Tuba1b, HSP90AA1, Hspa9, Psmc6, Psmc6, Rps19, Rplp0, Hdgf, Uba1, Eif2s1, Col2a1, Taf15, Sars1, Yars, Rpl34, Rps14, Rps4x, Rps5, LOC100360647, Rps25, Rps12, Nkap, Rpl17, Hist1h2ail1, Sumo2, Pkn3, Dkc1, Rpl27a, Tmed2, B3gnt2, Rpl35, Rlc-a, Tgfbi                                                                                                                                                                                                                                                                                                               |
| 3                         | GO:0005622 | Intracellular                                                     | Cellular Component | 45 | Rab1a, B3gnt2, Rpl17, Rpl27a, Rpl35, Rplp0, Rpl34, Rps12, Rps14, Rps19, Rps3, Rps4x, Rps5, Rps25, Hist1h2ail1, Psmc6, Psmc6, Uba1, Rab11a, Calm3, Dkc1, Vim, Actb, Rlc-a, Hspa9, Nkap, Hsp90b1, Htra1, Yars, Sars1, LOC100360647, Eif2s1, Ubc, HSP90AA1, Sumo2, Hdgf, Pkn3, Cpd, Sptbn1, Taf15, Tuba1b, Myoc, Col2a1, Tmed2, Tgfbi                                                                                                                                                                                                                                                                                                               |
| 3                         | GO:0044424 | Intracellular part                                                | Cellular Component | 45 | Psmc6, Psmc6, Ubc, Tuba1b, HSP90AA1, Vim, Rps19, Rps3, Myoc, Rab11a, Calm3, Rplp0, Hdgf, Hspa9, Uba1, Eif2s1, Col2a1, Sptbn1, Taf15, Sars1, Yars, Tmed2, Cpd, Rps12, Rpl34, Actb, Nkap, Rab1a, Hsp90b1, Rpl27a, Htra1, Rps14, Rps4x, Rps5, LOC100360647, Rps25, B3gnt2, Rpl17, Hist1h2ail1, Sumo2, Pkn3, Dkc1, Tgfbi, Rpl35, Rlc-a, Myoc, Rab11a, Tmed2, Cpd, Rps12, Actb, Sptbn1, Rpl34, Hspa9, Uba1, Vim, Ubc, Nkap, HSP90AA1, Rps3, Rpl17, Hist1h2ail1, Calm3, Rplp0, Sumo2, Hdgf, Pkn3, Rps25, Psmc6, Eif2s1, Taf15, Sars1, Dkc1, Hsp90b1, Rpl27a, B3gnt2, Rab1a, Rps14, Rps19, Rps4x, Rps5, LOC100360647, Tuba1b, Rpl35, Rlc-a, Tgfbi, Yars |
| 2                         | GO:0043226 | Organelle                                                         | Cellular Component | 42 | Rab11a, Tmed2, Cpd, Rps12, Rpl34, Hspa9, Uba1, Ubc, Actb, Nkap, HSP90AA1, Rps3, Rpl17, Hist1h2ail1, Calm3, Rplp0, Sumo2, Hdgf, Pkn3, Rps25, Psmc6, Eif2s1, Taf15, Sars1, Dkc1, Hsp90b1, Rpl27a, B3gnt2, Rab1a, Rps14, Rps19, Rps4x, Rps5, LOC100360647, Vim, Tuba1b, Rpl35, Rlc-a, Tgfbi, Yars                                                                                                                                                                                                                                                                                                                                                   |
| 3                         | GO:0043229 | Intracellular organelle                                           | Cellular Component | 42 | Rab11a, Tmed2, Cpd, Rps12, Rpl34, Hspa9, Uba1, Ubc, Actb, Nkap, HSP90AA1, Rps3, Rpl17, Hist1h2ail1, Calm3, Rplp0, Sumo2, Hdgf, Pkn3, Rps25, Psmc6, Eif2s1, Sptbn1, Taf15, Sars1, Dkc1, Hsp90b1, Myoc, Rpl27a, B3gnt2, Rab1a, Rps14, Rps19, Rps4x, Rps5, LOC100360647, Vim, Tuba1b, Rpl35, Rlc-a, Tgfbi, Yars                                                                                                                                                                                                                                                                                                                                     |

|   |            |                                              |                    |    |                                                                                                                                                                                                                                                                                                                                                                                                                                                                                                                                     |
|---|------------|----------------------------------------------|--------------------|----|-------------------------------------------------------------------------------------------------------------------------------------------------------------------------------------------------------------------------------------------------------------------------------------------------------------------------------------------------------------------------------------------------------------------------------------------------------------------------------------------------------------------------------------|
| 4 | GO:0005737 | Cytoplasm                                    | Cellular Component | 40 | Rlc-a, Rab1a, B3gnt2, Rpl17, Rpl27a, Rpl35, Rplp0, Rpl34, Rps12, Rps14, Rps19, Rps3, Rps4x, Rps5, Rps25, Hspa9, Uba1, Actb, Nkap, Vim, Hsp90b1, Calm3, Htra1, Yars, Sars1, LOC100360647, Eif2s1, Myoc, HSP90AA1, Rab11a, Tmed2, Cpd, Tgfbi, Tuba1b, Sptbn1, Psmc6, Ubc, Hdgf, Col2a1, Taf15                                                                                                                                                                                                                                         |
| 2 | GO:0044422 | Organelle part                               | Cellular Component | 37 | Calm3, Rlc-a, Sptbn1, Rpl17, Rps3, Myoc, Rab1a, B3gnt2, Uba1, Tmed2, Rab11a, Tgfbi, Cpd, Hspa9, Hsp90b1, Rpl27a, Rpl35, Rplp0, Rpl34, Rps12, Rps14, Rps19, Rps4x, Rps5, Rps25, Hist1h2ail1, Dkc1, Nkap, Hdgf, Taf15, Vim, Yars, Psmc6, Actb, Tuba1b, HSP90AA1, Myoc, Rpl17, Rps4x, Rps5, Hist1h2ail1, Nkap, Rps19, Calm3, Hdgf, Uba1, Taf15, Dkc1, Rps14, Rps3, Hspa9, Rps25, Sptbn1, Vim, Psmc6, Rab11a, Actb, Rab1a, B3gnt2, Hsp90b1, Tmed2, HSP90AA1, Rpl27a, Rpl35, Rplp0, Rpl34, Rps12, Rlc-a, Tgfbi, Cpd, Yars, Tuba1b, Sumo2 |
| 3 | GO:0044446 | Intracellular organelle part                 | Cellular Component | 37 | Rpl34, Hspa9, Uba1, Actb, Nkap, Vim, Rab1a, Rps19, Rps3, Hsp90b1, Rpl27a, Calm3, Rplp0, Htra1, Rps12, Yars, Sars1, Rps14, Rps4x, Rps5, LOC100360647, Rps25, Eif2s1, Myoc, Tmed2, B3gnt2, Rab11a, Cpd, Tuba1b, Rpl17, Rpl35, Psmc6, Sptbn1, Rlc-a, HSP90AA1, Tgfbi                                                                                                                                                                                                                                                                   |
| 4 | GO:0044444 | Cytoplasmic part                             | Cellular Component | 36 | Rab11a, Tmed2, Cpd, Rps12, Rpl34, Hspa9, Uba1, Ubc, Actb, Nkap, HSP90AA1, Rps3, Rpl17, Hist1h2ail1, Calm3, Rplp0, Sumo2, Hdgf, Pkn3, Rps25, Psmc6, Eif2s1, Sptbn1, Taf15, Sars1, Dkc1, Hsp90b1, Myoc, Rpl27a, B3gnt2, Rab1a, Vim, Tgfbi, Rps19, Rps14, Yars                                                                                                                                                                                                                                                                         |
| 3 | GO:0043227 | Membrane-bounded organelle                   | Cellular Component | 36 | Rpl34, Hspa9, Uba1, Ubc, Actb, Nkap, HSP90AA1, Rps3, Rpl17, Hist1h2ail1, Calm3, Rplp0, Sumo2, Hdgf, Pkn3, Rps25, Cpd, Psmc6, Eif2s1, Sptbn1, Taf15, Sars1, Dkc1, Hsp90b1, Myoc, Rpl27a, Tmed2, B3gnt2, Rab1a, Rab11a, Rps12, Vim, Rps19, Rps14, Yars, Tgfbi                                                                                                                                                                                                                                                                         |
| 4 | GO:0043231 | Intracellular membrane-bounded organelle     | Cellular Component | 36 | Actb, Col2a1, Psmc6, Eif2s1, Psmc6, Hdgf, Yars, Hsp90b1, Rps3, Calm3, Rps14, Rps19, Rpl34, Rps4x, Rps5, LOC100360647, Rps25, Rps12, Dkc1, Vim, Rpl17, Rlc-a, Hist1h2ail1, Rpl27a, Rplp0, Rpl35, Rab11a, Sptbn1                                                                                                                                                                                                                                                                                                                      |
| 2 | GO:0032991 | Protein-containing complex                   | Cellular Component | 28 | Hist1h2ail1, Dkc1, Nkap, Rps19, Calm3, Hdgf, Uba1, Taf15, Rps14, Rps3, Hspa9, Rps25, Sptbn1, Vim, Yars, Sumo2, Psmc6, Actb, Ubc, HSP90AA1, Rpl17, Rplp0, Pkn3, Cpd, Eif2s1, Sars1                                                                                                                                                                                                                                                                                                                                                   |
| 5 | GO:0005634 | Nucleus                                      | Cellular Component | 26 | Actb, Rps14, Rps19, Rps3, Rpl34, Rps4x, Rps5, LOC100360647, Rps25, Rps12, Eif2s1, Hspa9, Sptbn1, Dkc1, Vim, Rpl27a, Hist1h2ail1, Tuba1b, Rplp0, Rab11a, Calm3, Rpl17, Rpl35, Rlc-a, Uba1                                                                                                                                                                                                                                                                                                                                            |
| 3 | GO:0043228 | Non-membrane-bounded organelle               | Cellular Component | 25 | Actb, Rps14, Rps19, Rps3, Rpl34, Rps4x, Rps5, LOC100360647, Rps25, Rps12, Eif2s1, Hspa9, Sptbn1, Dkc1, Vim, Rpl27a, Hist1h2ail1, Tuba1b, Rplp0, Rab11a, Calm3, Rpl17, Rpl35, Rlc-a, Uba1                                                                                                                                                                                                                                                                                                                                            |
| 4 | GO:0043232 | Intracellular non-membrane-bounded organelle | Cellular Component | 25 | Actb, Rps14, Rps19, Rps3, Rpl34, Rps4x, Rps5, LOC100360647, Rps25, Rps12, Eif2s1, Hspa9, Sptbn1, Dkc1, Vim, Rpl27a, Hist1h2ail1, Tuba1b, Rplp0, Rab11a, Calm3, Rpl17, Rpl35, Rlc-a, Uba1                                                                                                                                                                                                                                                                                                                                            |
| 5 | GO:0005829 | Cytosol                                      | Cellular Component | 23 | Rpl17, Rpl27a, Rpl35, Rplp0, Rpl34, Rps12, Rps14, Rps19, Rps3, Rps4x, Rps5, Rps25, Psmc6, Actb, Nkap, Vim, Rab1a, Hsp90b1, Calm3, Htra1, Uba1, Yars, Sars1                                                                                                                                                                                                                                                                                                                                                                          |
| 2 | GO:0031974 | Membrane-enclosed lumen                      | Cellular Component | 20 | Rps3, Hspa9, Hsp90b1, Myoc, Hist1h2ail1, Nkap, Rps19, Calm3, Hdgf, Uba1, Taf15, Dkc1, Rps14, Rps25, Sptbn1, Psmc6, Vim, Yars, Sumo2, Actb                                                                                                                                                                                                                                                                                                                                                                                           |
| 3 | GO:0043233 | Organelle lumen                              | Cellular Component | 20 | Rps3, Hspa9, Hsp90b1, Myoc, Hist1h2ail1, Nkap, Rps19, Calm3, Hdgf, Uba1, Taf15, Dkc1, Rps14, Rps25, Sptbn1, Psmc6, Vim, Yars, Sumo2, Actb                                                                                                                                                                                                                                                                                                                                                                                           |
| 4 | GO:0070013 | Intracellular organelle lumen                | Cellular Component | 20 | Rps3, Hspa9, Hsp90b1, Myoc, Hist1h2ail1, Nkap, Rps19, Calm3, Hdgf, Uba1, Taf15, Dkc1, Rps14, Rps25, Sptbn1, Psmc6, Vim, Yars, Sumo2, Actb                                                                                                                                                                                                                                                                                                                                                                                           |
| 4 | GO:0044428 | Nuclear part                                 | Cellular Component | 18 | Hist1h2ail1, Nkap, Rps19, Calm3, Hdgf, Uba1, Taf15, Dkc1, Rps14, Rps3, Hspa9, Rps25, Sptbn1, Vim, Psmc6, Yars, Sumo2, Actb                                                                                                                                                                                                                                                                                                                                                                                                          |
| 5 | GO:0031981 | Nuclear lumen                                | Cellular Component | 18 | Hist1h2ail1, Nkap, Rps19, Calm3, Hdgf, Uba1, Taf15, Dkc1, Rps14, Rps3, Hspa9, Rps25, Sptbn1, Psmc6, Vim, Yars, Sumo2, Actb                                                                                                                                                                                                                                                                                                                                                                                                          |
| 2 | GO:0016020 | Membrane                                     | Cellular Component | 17 | Actb, Vim, Rps3, Hsp90b1, Calm3, Htra1, Cpd, Sptbn1, Rab1a, Tmed2, Uba1, Rab11a, HSP90AA1, Myoc, B3gnt2, Tuba1b, Rplp0                                                                                                                                                                                                                                                                                                                                                                                                              |
| 3 | GO:1990904 | Ribonucleoprotein complex                    | Cellular Component | 17 | Rps14, Rps19, Rps3, Rpl34, Rps4x, Rps5, LOC100360647, Rps25, Rps12, Eif2s1, Dkc1, Vim, Rpl17, Rpl27a, Actb, Rplp0, Rpl35                                                                                                                                                                                                                                                                                                                                                                                                            |

|   |            |                                              |                    |    |                                                                                                         |
|---|------------|----------------------------------------------|--------------------|----|---------------------------------------------------------------------------------------------------------|
| 3 | GO:0012505 | Endomembrane system                          | Cellular Component | 15 | Rab11a, Rps3, Hsp90b1, Myoc, Rpl27a, Rplp0, Rpl34, Tmed2, B3gnt2, Rab1a, Cpd, Rps12, Uba1, Calm3, Tgfbf |
| 4 | GO:0005840 | Ribosome                                     | Cellular Component | 14 | Rpl27a, Rpl17, Rpl35, Rplp0, Rpl34, Rps12, Rps14, Rps19, Rps3, Rps4x, Rps5, Rps25, LOC100360647, Eif2s1 |
| 5 | GO:0031410 | Cytoplasmic vesicle                          | Cellular Component | 10 | Rab11a, Rab1a, Tmed2, Vim, HSP90AA1, Hsp90b1, Cpd, Calm3, Uba1, Myoc                                    |
| 2 | GO:0044425 | Membrane part                                | Cellular Component | 12 | Rab1a, Hsp90b1, Tmed2, Uba1, B3gnt2, Cpd, Sptbn1, Rps3, Calm3, Rab11a, Tuba1b, Actb                     |
| 4 | GO:0044391 | Ribosomal subunit                            | Cellular Component | 12 | Rpl17, Rps4x, Rps5, Rpl27a, Rpl35, Rplp0, Rpl34, Rps12, Rps14, Rps19, Rps3, Rps25                       |
| 5 | GO:0022626 | Cytosolic ribosome                           | Cellular Component | 12 | Rpl17, Rpl27a, Rpl35, Rplp0, Rpl34, Rps12, Rps14, Rps19, Rps3, Rps4x, Rps5, Rps25                       |
| 5 | GO:0005654 | Nucleoplasm                                  | Cellular Component | 11 | Dkc1, Yars, Sumo2, Actb, Nkap, Rps19, Hist1h2ail1, Calm3, Hdgf, Uba1, Taf15                             |
| 3 | GO:0071944 | Cell periphery                               | Cellular Component | 10 | Actb, Vim, Rps3, Hsp90b1, Calm3, Htra1, Cpd, Sptbn1, Rlc-a, Rab11a                                      |
| 3 | GO:0097458 | Neuron part                                  | Cellular Component | 10 | Actb, Sptbn1, Vim, Calm3, Rab1a, Cpd, Rab11a, Rps3, Rplp0, Myoc                                         |
| 4 | GO:0031982 | Vesicle                                      | Cellular Component | 10 | Myoc, Rab11a, Rab1a, Tmed2, Cpd, HSP90AA1, Hsp90b1, Vim, Calm3, Uba1                                    |
| 4 | GO:0097708 | Intracellular vesicle                        | Cellular Component | 10 | Myoc, Rab11a, Rab1a, Tmed2, Vim, Cpd, HSP90AA1, Hsp90b1, Calm3, Uba1                                    |
| 4 | GO:0005783 | Endoplasmic reticulum                        | Cellular Component | 10 | Hsp90b1, Myoc, Uba1, Rab1a, Tmed2, Rps3, Rpl27a, Rplp0, Rpl34, B3gnt2                                   |
| 5 | GO:0044445 | Cytosolic part                               | Cellular Component | 10 | Rpl17, Rpl27a, Rpl35, Rplp0, Rpl34, Rps12, Rps14, Rps19, Rps3, Rps4x, Rps5, Rps25, Psmc6                |
| 2 | GO:0005576 | Extracellular region                         | Cellular Component | 9  | Col2a1, Tgfbf, Myoc, Htra1, Hdgf, Cpd, Angpt1, Chrd, Rab11a                                             |
| 2 | GO:0044421 | Extracellular region part                    | Cellular Component | 9  | Myoc, Htra1, Tgfbf, Hdgf, Cpd, Angpt1, Col2a1, Chrd, Rab11a                                             |
| 3 | GO:0005615 | Extracellular space                          | Cellular Component | 9  | Myoc, Rab11a, Htra1, Tgfbf, Hdgf, Cpd, Angpt1, Col2a1, Chrd                                             |
| 3 | GO:0005886 | Plasma membrane                              | Cellular Component | 9  | Calm3, Sptbn1, Rab11a, Rps3, Cpd, Actb, Vim, Hsp90b1, Htra1                                             |
| 3 | GO:0031090 | Organelle membrane                           | Cellular Component | 9  | Calm3, Rps3, Myoc, Rab1a, B3gnt2, Uba1, Tmed2, HSP90AA1, Rab11a                                         |
| 3 | GO:0042995 | Cell projection                              | Cellular Component | 9  | Myoc, Vim, Calm3, Actb, Rab11a, Rps3, Rplp0, Eif2s1, Sptbn1                                             |
| 4 | GO:0120025 | Plasma membrane bounded cell projection      | Cellular Component | 9  | Myoc, Vim, Calm3, Actb, Rab11a, Rps3, Rplp0, Eif2s1, Sptbn1                                             |
| 4 | GO:0005794 | Golgi apparatus                              | Cellular Component | 8  | Rab1a, B3gnt2, Rab11a, Tgfbf, Cpd, Tmed2, Myoc, Rps12                                                   |
| 4 | GO:0031984 | Organelle subcompartment                     | Cellular Component | 8  | Rab11a, Tgfbf, Cpd, Tmed2, Rab1a, B3gnt2, Hsp90b1, Uba1                                                 |
| 4 | GO:0098588 | Bounding membrane of organelle               | Cellular Component | 8  | Rab1a, B3gnt2, Uba1, Tmed2, Rab11a, Myoc, HSP90AA1, Calm3                                               |
| 4 | GO:0043005 | Neuron projection                            | Cellular Component | 8  | Actb, Vim, Rab11a, Rps3, Rplp0, Sptbn1, Calm3, Myoc                                                     |
| 2 | GO:0099080 | Supramolecular complex                       | Cellular Component | 8  | Vim, Tuba1b, Rab11a, Calm3, Rlc-a, Sptbn1, Rpl17, Col2a1                                                |
| 3 | GO:0099081 | Supramolecular polymer                       | Cellular Component | 8  | Vim, Tuba1b, Calm3, Rab11a, Rlc-a, Sptbn1, Rpl17, Col2a1                                                |
| 4 | GO:0099512 | Supramolecular fiber                         | Cellular Component | 8  | Vim, Tuba1b, Rab11a, Calm3, Rlc-a, Sptbn1, Rpl17, Col2a1                                                |
| 3 | GO:0098805 | Whole membrane                               | Cellular Component | 8  | Uba1, Tmed2, Rab11a, Myoc, HSP90AA1, Calm3, Tuba1b, Actb                                                |
| 5 | GO:0005856 | Cytoskeleton                                 | Cellular Component | 8  | Actb, Tuba1b, Sptbn1, Rab11a, Vim, Calm3, Rlc-a, Rps3                                                   |
| 4 | GO:0044430 | Cytoskeletal part                            | Cellular Component | 8  | Rab11a, Calm3, Actb, Sptbn1, Rps3, Rlc-a, Vim, Tuba1b                                                   |
| 3 | GO:0043209 | Myelin sheath                                | Cellular Component | 7  | Myoc, Ubc, Tuba1b, Actb, HSP90AA1, Calm3, Hspa9                                                         |
| 5 | GO:0005730 | Nucleolus                                    | Cellular Component | 7  | Dkc1, Rps14, Rps19, Rps3, Hspa9, Rps25, Sptbn1                                                          |
| 5 | GO:0015935 | Small ribosomal subunit                      | Cellular Component | 7  | Rps14, Rps19, Rps3, Rps4x, Rps5, Rps25, Rps12                                                           |
| 6 | GO:0022627 | Cytosolic small ribosomal subunit            | Cellular Component | 7  | Rps14, Rps19, Rps3, Rps4x, Rps5, Rps25, Rps12                                                           |
| 4 | GO:0044431 | Golgi apparatus part                         | Cellular Component | 6  | Rab1a, B3gnt2, Tmed2, Rab11a, Tgfbf, Cpd                                                                |
| 5 | GO:0098791 | Golgi subcompartment                         | Cellular Component | 6  | Rab1a, B3gnt2, Rab11a, Tgfbf, Cpd, Tmed2                                                                |
| 5 | GO:0030424 | Axon                                         | Cellular Component | 6  | Calm3, Sptbn1, Myoc, Actb, Vim, Rab11a                                                                  |
| 2 | GO:0044456 | Synapse part                                 | Cellular Component | 6  | Calm3, Cpd, Rab1a, Rab11a, Actb, Sptbn1                                                                 |
| 2 | GO:0045202 | Synapse                                      | Cellular Component | 6  | Actb, Sptbn1, Calm3, Cpd, Rab1a, Rab11a                                                                 |
| 5 | GO:0005739 | Mitochondrion                                | Cellular Component | 6  | Myoc, Rps3, Hspa9, Calm3, Rpl34, Uba1                                                                   |
| 5 | GO:0015934 | Large ribosomal subunit                      | Cellular Component | 6  | Rpl17, Rpl27a, Rpl35, Rplp0, Rpl34, Rps12                                                               |
| 6 | GO:0022625 | Cytosolic large ribosomal subunit            | Cellular Component | 6  | Rpl17, Rpl27a, Rpl35, Rplp0, Rpl34, Rps12                                                               |
| 3 | GO:0031012 | Extracellular matrix                         | Cellular Component | 5  | Tgfbf, Col2a1, Myoc, Htra1, Hdgf                                                                        |
| 3 | GO:0044459 | Plasma membrane part                         | Cellular Component | 5  | Rps3, Rab11a, Cpd, Calm3, Sptbn1                                                                        |
| 3 | GO:0044463 | Cell projection part                         | Cellular Component | 5  | Rps3, Rplp0, Sptbn1, Calm3, Myoc                                                                        |
| 4 | GO:0120038 | Plasma membrane bounded cell projection part | Cellular Component | 5  | Rps3, Rplp0, Calm3, Sptbn1, Myoc                                                                        |
| 6 | GO:0099503 | Secretory vesicle                            | Cellular Component | 5  | Cpd, Rab1a, Rab11a, Calm3, Tmed2                                                                        |

|   |            |                                                               |                    |   |                                 |
|---|------------|---------------------------------------------------------------|--------------------|---|---------------------------------|
| 3 | GO:1902494 | Catalytic complex                                             | Cellular Component | 5 | Dkc1, Psmc6, Psmc6, Actb, Calm3 |
| 4 | GO:0005844 | Polysome                                                      | Cellular Component | 5 | Vim, Rps3, Rpl17, Rps4x, Rps25  |
| 3 | GO:0031224 | Intrinsic component of membrane                               | Cellular Component | 4 | Tmed2, B3gnt2, Cpd, Calm3       |
| 4 | GO:0016021 | Integral component of membrane                                | Cellular Component | 4 | Calm3, Tmed2, B3gnt2, Cpd       |
| 3 | GO:0098590 | Plasma membrane region                                        | Cellular Component | 4 | Rab11a, Cpd, Rps3, Sptbn1       |
| 5 | GO:0048471 | Perinuclear region of cytoplasm                               | Cellular Component | 4 | Vim, Hsp90b1, Rab11a, Cpd       |
| 4 | GO:0044429 | Mitochondrial part                                            | Cellular Component | 4 | Myoc, Rps3, Hspa9, Calm3        |
| 6 | GO:0015630 | Microtubule cytoskeleton                                      | Cellular Component | 4 | Rab11a, Tuba1b, Calm3, Rps3     |
| 5 | GO:0099513 | Polymeric cytoskeletal fiber                                  | Cellular Component | 4 | Vim, Tuba1b, Calm3, Rab11a      |
| 4 | GO:0036477 | Somatodendritic compartment                                   | Cellular Component | 4 | Rab1a, Cpd, Rps3, Rplp0         |
| 4 | GO:0035770 | Ribonucleoprotein granule                                     | Cellular Component | 4 | Actb, Rplp0, Rps4x, Eif2s1      |
| 4 | GO:0044433 | Cytoplasmic vesicle part                                      | Cellular Component | 4 | Tmed2, Uba1, Calm3, Rab11a      |
| 5 | GO:0036464 | Cytoplasmic ribonucleoprotein granule                         | Cellular Component | 4 | Eif2s1, Actb, Rplp0, Rps4x      |
| 3 | GO:0005789 | Endoplasmic reticulum membrane                                | Cellular Component | 4 | Uba1, Rab1a, Hsp90b1, Tmed2     |
| 3 | GO:0042175 | Nuclear outer membrane-endoplasmic reticulum membrane network | Cellular Component | 4 | Rab1a, Hsp90b1, Tmed2, Uba1     |
| 4 | GO:0044432 | Endoplasmic reticulum part                                    | Cellular Component | 4 | Hsp90b1, Rab1a, Tmed2, Uba1     |
| 5 | GO:0098827 | Endoplasmic reticulum subcompartment                          | Cellular Component | 4 | Rab1a, Hsp90b1, Tmed2, Uba1     |
| 3 | GO:0044449 | Contractile fiber part                                        | Cellular Component | 4 | Calm3, Rlc-a, Sptbn1, Rpl17     |
| 4 | GO:0030017 | Sarcomere                                                     | Cellular Component | 4 | Rpl17, Sptbn1, Rlc-a, Calm3     |
| 5 | GO:0043292 | Contractile fiber                                             | Cellular Component | 4 | Calm3, Rlc-a, Sptbn1, Rpl17     |
| 6 | GO:0030016 | Myofibril                                                     | Cellular Component | 4 | Calm3, Rpl17, Sptbn1, Rlc-a     |
| 5 | GO:0044451 | Nucleoplasm part                                              | Cellular Component | 4 | Yars, Dkc1, Sumo2, Actb         |
| 6 | GO:0005802 | Trans-golgi network                                           | Cellular Component | 3 | Rab11a, Tgfbi, Cpd              |
| 3 | GO:0044297 | Cell body                                                     | Cellular Component | 3 | Rab1a, Cpd, Vim                 |
| 4 | GO:0033267 | Axon part                                                     | Cellular Component | 3 | Calm3, Sptbn1, Myoc             |
| 3 | GO:0031975 | Envelope                                                      | Cellular Component | 3 | Myoc, Calm3, Rps3               |
| 4 | GO:0031967 | Organelle envelope                                            | Cellular Component | 3 | Myoc, Calm3, Rps3               |
| 5 | GO:0000139 | Golgi membrane                                                | Cellular Component | 3 | Tmed2, Rab1a, B3gnt2            |
| 5 | GO:0005740 | Mitochondrial envelope                                        | Cellular Component | 3 | Myoc, Calm3, Rps3               |
| 4 | GO:0031966 | Mitochondrial membrane                                        | Cellular Component | 3 | Myoc, Rps3, Calm3               |
| 6 | GO:0015629 | Actin cytoskeleton                                            | Cellular Component | 3 | Actb, Rlc-a, Sptbn1             |
| 6 | GO:0048770 | Pigment granule                                               | Cellular Component | 3 | HSP90AA1, Rab1a, Hsp90b1        |
| 6 | GO:0005874 | Microtubule                                                   | Cellular Component | 3 | Calm3, Tuba1b, Rab11a           |
| 7 | GO:0042470 | Melanosome                                                    | Cellular Component | 3 | HSP90AA1, Rab1a, Hsp90b1        |
| 4 | GO:0005938 | Cell cortex                                                   | Cellular Component | 3 | Rlc-a, Sptbn1, Actb             |
| 5 | GO:0099568 | Cytoplasmic region                                            | Cellular Component | 3 | Rlc-a, Sptbn1, Actb             |
| 5 | GO:0044448 | Cell cortex part                                              | Cellular Component | 3 | Sptbn1, Actb, Rlc-a             |
| 3 | GO:0098794 | Postsynapse                                                   | Cellular Component | 3 | Rab11a, Actb, Sptbn1            |
| 3 | GO:0031252 | Cell leading edge                                             | Cellular Component | 3 | Sptbn1, Rps3, Vim               |
| 4 | GO:0005768 | Endosome                                                      | Cellular Component | 3 | Rab1a, Rab11a, Uba1             |
| 4 | GO:0030133 | Transport vesicle                                             | Cellular Component | 3 | Rab1a, Rab11a, Calm3            |
| 5 | GO:0005819 | Spindle                                                       | Cellular Component | 3 | Rab11a, Calm3, Rps3             |
| 5 | GO:0070382 | Exocytic vesicle                                              | Cellular Component | 3 | Calm3, Rab1a, Rab11a            |
| 5 | GO:0000785 | Chromatin                                                     | Cellular Component | 2 | Hist1h2ail1, Uba1               |
| 6 | GO:0016604 | Nuclear body                                                  | Cellular Component | 3 | Dkc1, Sumo2, Yars               |
| 4 | GO:0062023 | Collagen-containing extracellular matrix                      | Cellular Component | 2 | Tgfbi, Col2a1                   |
| 5 | GO:0005604 | Basement membrane                                             | Cellular Component | 2 | Tgfbi, Col2a1                   |
| 4 | GO:0043025 | Neuronal cell body                                            | Cellular Component | 2 | Rab1a, Cpd                      |
| 4 | GO:0030141 | Secretory granule                                             | Cellular Component | 2 | Tmed2, Cpd                      |
| 3 | GO:0043230 | Extracellular organelle                                       | Cellular Component | 2 | Myoc, Rab11a                    |
| 4 | GO:0019866 | Organelle inner membrane                                      | Cellular Component | 2 | Rps3, Myoc                      |
| 4 | GO:1903561 | Extracellular vesicle                                         | Cellular Component | 2 | Myoc, Rab11a                    |
| 4 | GO:0070062 | Extracellular exosome                                         | Cellular Component | 2 | Myoc, Rab11a                    |
| 5 | GO:0005743 | Mitochondrial inner membrane                                  | Cellular Component | 2 | Rps3, Myoc                      |
| 5 | GO:0005791 | Rough endoplasmic reticulum                                   | Cellular Component | 2 | Uba1, Myoc                      |
| 5 | GO:0044304 | Main axon                                                     | Cellular Component | 2 | Sptbn1, Myoc                    |
| 4 | GO:1905368 | Peptidase complex                                             | Cellular Component | 2 | Psmc6, Psmc6                    |

|   |            |                                   |                    |   |                   |
|---|------------|-----------------------------------|--------------------|---|-------------------|
| 4 | GO:0000502 | Proteasome complex                | Cellular Component | 2 | Psmc6, Psmc6      |
| 5 | GO:1905369 | Endopeptidase complex             | Cellular Component | 2 | Psmc6, Psmc6      |
| 2 | GO:0030054 | Cell junction                     | Cellular Component | 2 | Uba1, Actb        |
| 3 | GO:0098793 | Presynapse                        | Cellular Component | 2 | Calm3, Rab1a      |
| 5 | GO:0005815 | Microtubule organizing center     | Cellular Component | 2 | Rab11a, Calm3     |
| 6 | GO:0005813 | Centrosome                        | Cellular Component | 2 | Rab11a, Calm3     |
| 4 | GO:0012506 | Vesicle membrane                  | Cellular Component | 2 | Calm3, Tmed2      |
| 4 | GO:0031253 | Cell projection membrane          | Cellular Component | 2 | Rps3, Sptbn1      |
| 4 | GO:0044427 | Chromosomal part                  | Cellular Component | 2 | Hist1h2ail1, Uba1 |
| 5 | GO:0030659 | Cytoplasmic vesicle membrane      | Cellular Component | 2 | Tmed2, Calm3      |
| 5 | GO:0005773 | Vacuole                           | Cellular Component | 2 | HSP90AA1, Uba1    |
| 5 | GO:0005694 | Chromosome                        | Cellular Component | 2 | Hist1h2ail1, Uba1 |
| 5 | GO:0030425 | Dendrite                          | Cellular Component | 2 | Rps3, Rplp0       |
| 5 | GO:0097447 | Dendritic tree                    | Cellular Component | 2 | Rps3, Rplp0       |
| 6 | GO:0000323 | Lytic vacuole                     | Cellular Component | 2 | HSP90AA1, Uba1    |
| 7 | GO:0005764 | Lysosome                          | Cellular Component | 2 | HSP90AA1, Uba1    |
| 3 | GO:0005838 | Proteasome regulatory particle    | Cellular Component | 2 | Psmc6, Psmc6      |
| 3 | GO:0022624 | Proteasome accessory complex      | Cellular Component | 2 | Psmc6, Psmc6      |
| 4 | GO:0005774 | Vacuolar membrane                 | Cellular Component | 2 | HSP90AA1, Uba1    |
| 4 | GO:0044437 | Vacuolar part                     | Cellular Component | 2 | HSP90AA1, Uba1    |
| 5 | GO:0098852 | Lytic vacuole membrane            | Cellular Component | 2 | HSP90AA1, Uba1    |
| 5 | GO:0032432 | Actin filament bundle             | Cellular Component | 2 | Actb, Rlc-a       |
| 5 | GO:0042641 | Actomyosin                        | Cellular Component | 2 | Actb, Rlc-a       |
| 6 | GO:0005765 | Lysosomal membrane                | Cellular Component | 2 | HSP90AA1, Uba1    |
| 6 | GO:0030863 | Cortical cytoskeleton             | Cellular Component | 2 | Sptbn1, Actb      |
| 6 | GO:0030139 | Endocytic vesicle                 | Cellular Component | 2 | Vim, Rab11a       |
| 6 | GO:0097517 | Contractile actin filament bundle | Cellular Component | 2 | Actb, Rlc-a       |
| 6 | GO:0001725 | Stress fiber                      | Cellular Component | 2 | Actb, Rlc-a       |
| 3 | GO:0098589 | Membrane region                   | Cellular Component | 2 | Tuba1b, Actb      |
| 3 | GO:0070161 | Anchoring junction                | Cellular Component | 2 | Uba1, Actb        |
| 3 | GO:0099572 | Postsynaptic specialization       | Cellular Component | 2 | Actb, Sptbn1      |
| 3 | GO:0098984 | Neuron to neuron synapse          | Cellular Component | 2 | Actb, Sptbn1      |
| 4 | GO:0098857 | Membrane microdomain              | Cellular Component | 2 | Tuba1b, Actb      |
| 4 | GO:0010008 | Endosome membrane                 | Cellular Component | 2 | Rab11a, Uba1      |
| 4 | GO:0014069 | Postsynaptic density              | Cellular Component | 2 | Actb, Sptbn1      |
| 4 | GO:0031672 | A band                            | Cellular Component | 2 | Sptbn1, Rpl17     |
| 4 | GO:0032279 | Asymmetric synapse                | Cellular Component | 2 | Actb, Sptbn1      |
| 5 | GO:0045121 | Membrane raft                     | Cellular Component | 2 | Tuba1b, Actb      |
| 5 | GO:0005759 | Mitochondrial matrix              | Cellular Component | 2 | Hspa9, Rps3       |
| 5 | GO:0044440 | Endosomal part                    | Cellular Component | 2 | Uba1, Rab11a      |
| 7 | GO:0045335 | Phagocytic vesicle                | Cellular Component | 2 | Vim, Rab11a       |
| 4 | GO:0031256 | Leading edge membrane             | Cellular Component | 2 | Rps3, Sptbn1      |
| 5 | GO:0000922 | Spindle pole                      | Cellular Component | 2 | Rab11a, Calm3     |
| 6 | GO:0005876 | Spindle microtubule               | Cellular Component | 2 | Rab11a, Calm3     |
